# Supplementary material
Source: PubMed Central journal article supplement (PMC8237672)

**Dataset S1. Single-cell labeling and descendants tracing for all the 216 positions of early foregut endoderm underneath the levels between somite-1 and somite-4.**

**L-c1s1r1 (n=6)**

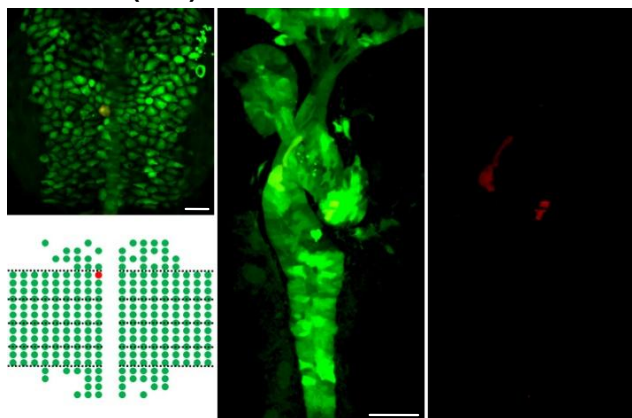

**R-c1s1r1 (n=7)**

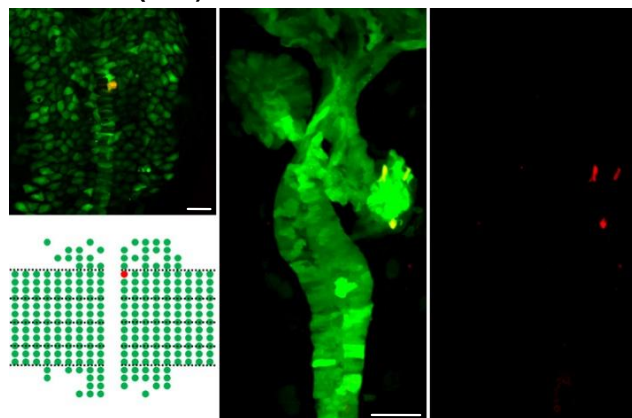

**L-c1s1r2 (n=5)**

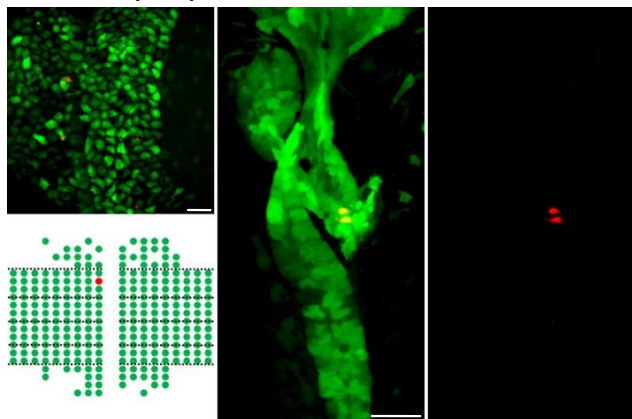

**R-c1s1r2 (n=10)**

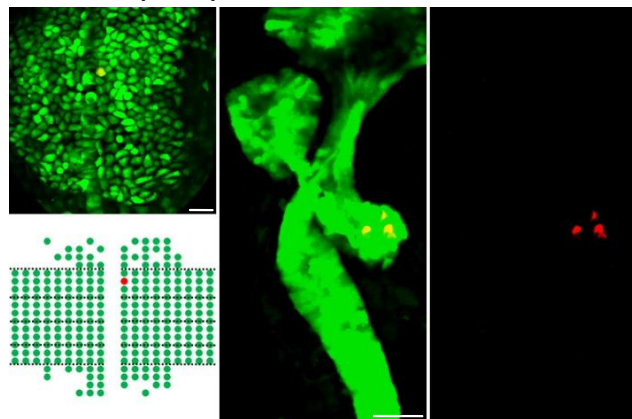

**L-c1s1r3 (n=5)**

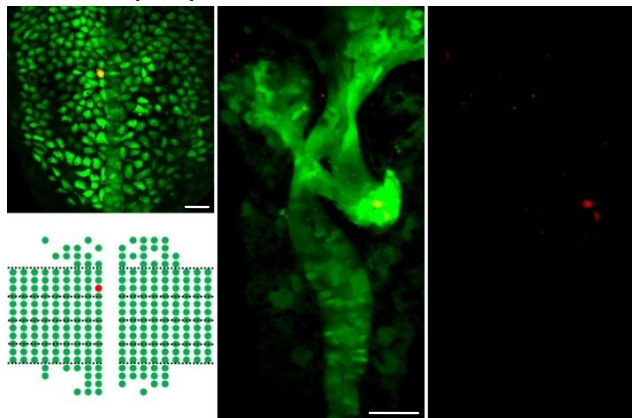

**R-c1s1r3 (n=5)**

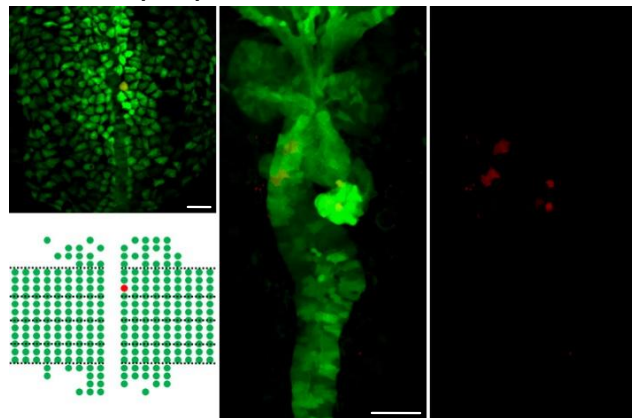

L-c1s12 (n=5)

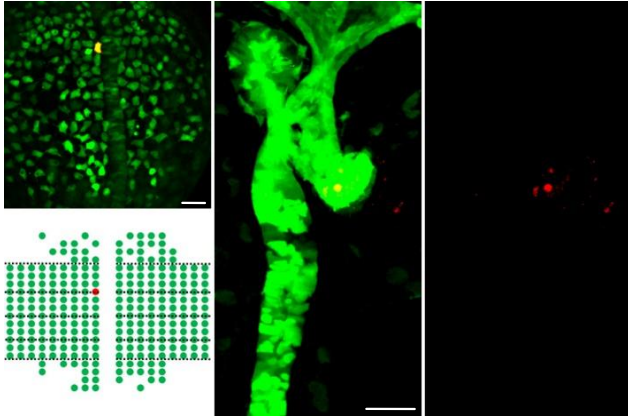

R-c1s12 (n=5)

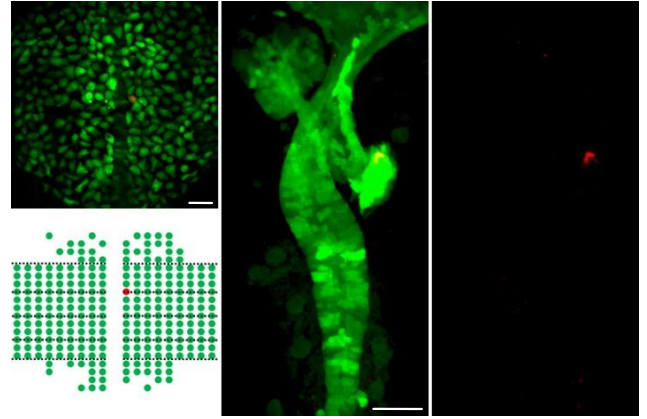

L-c1s2r1 (n=8)

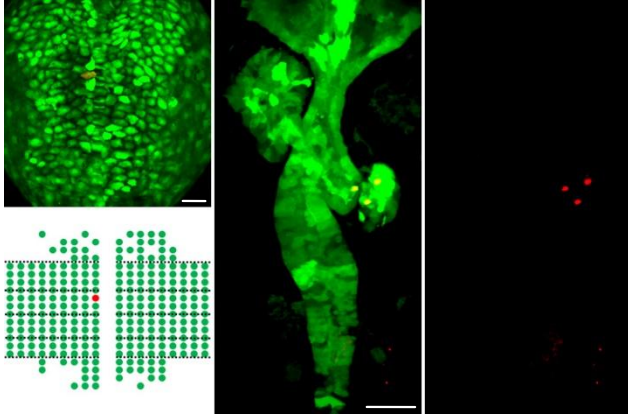

R-c1s2r1 (n=5)

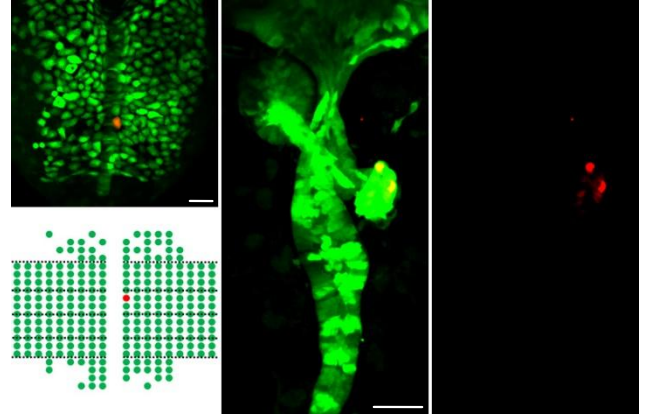

L-c1s2r2 (n=5)

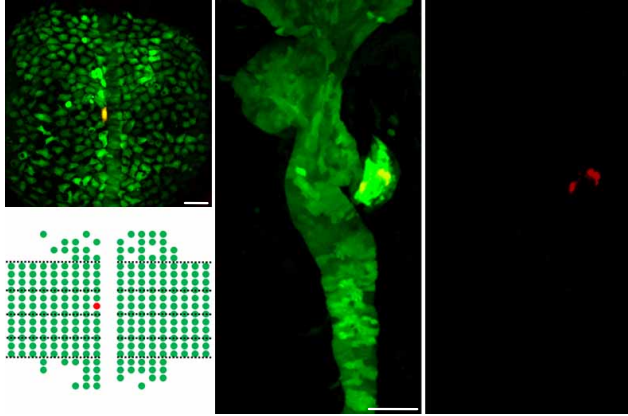

R-c1s2r2 (n=6)

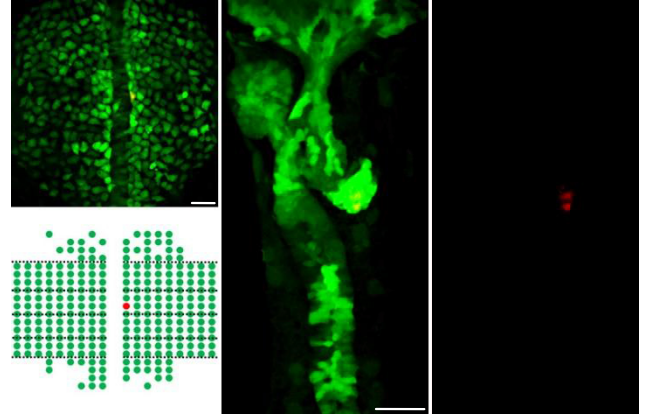

L-c1s23 (n=5)

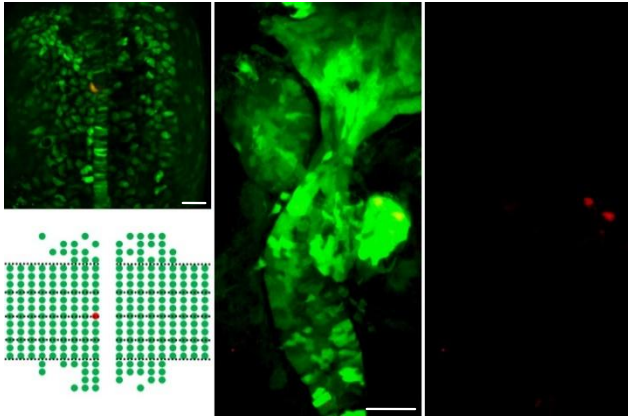

R-c1s23 (n=5)

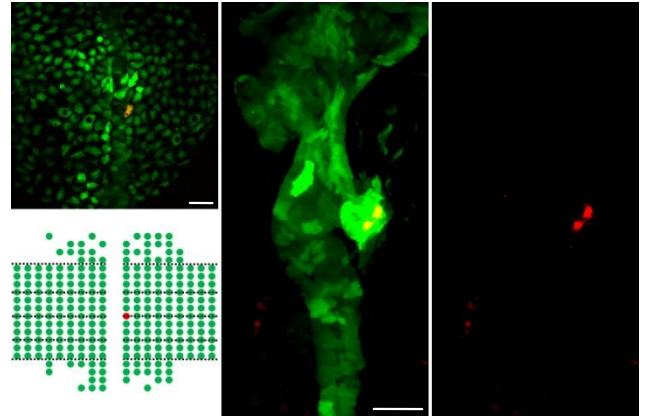





L-c2s12 (n=8)

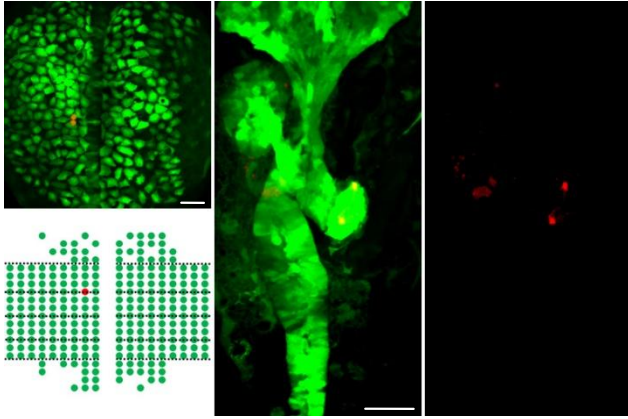

R-c2s12 (n=5)

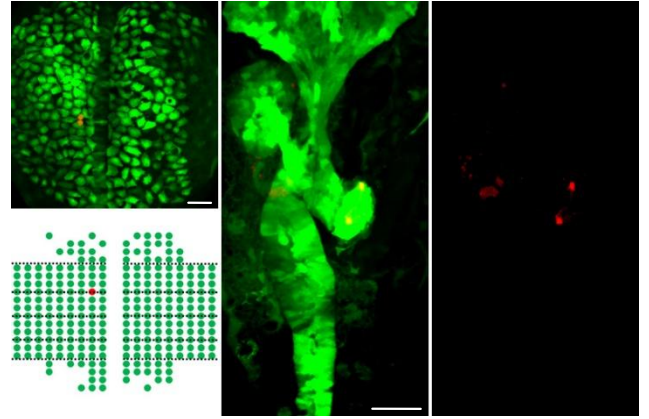

L-c2s2r1 (n=5)

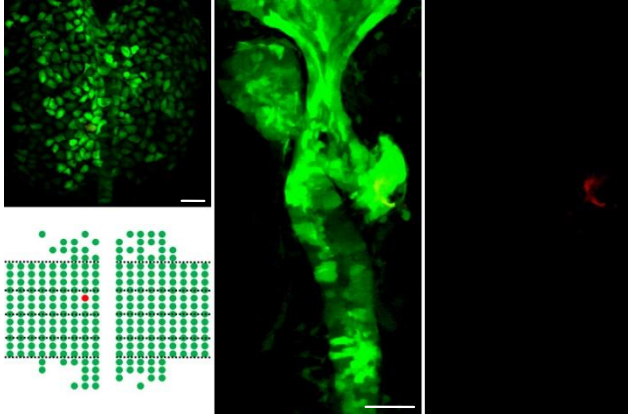

R-c2s2r1 (n=5)

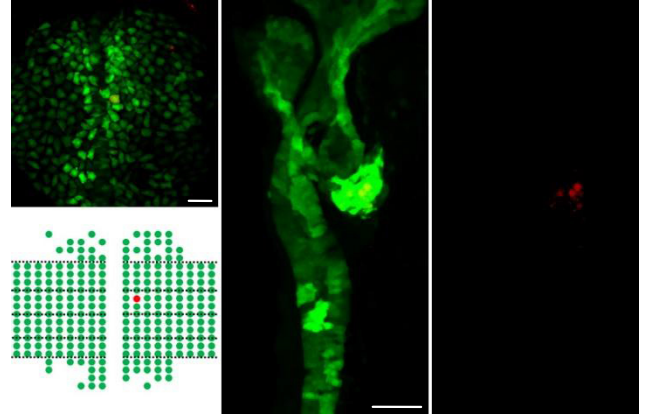

L-c2s2r2 (n=5)

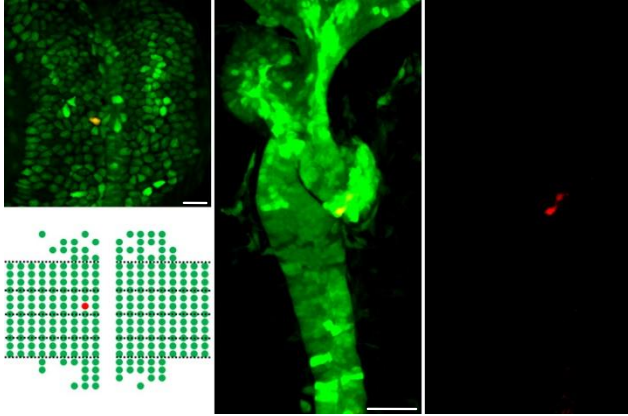

R-c2s2r2 (n=8)

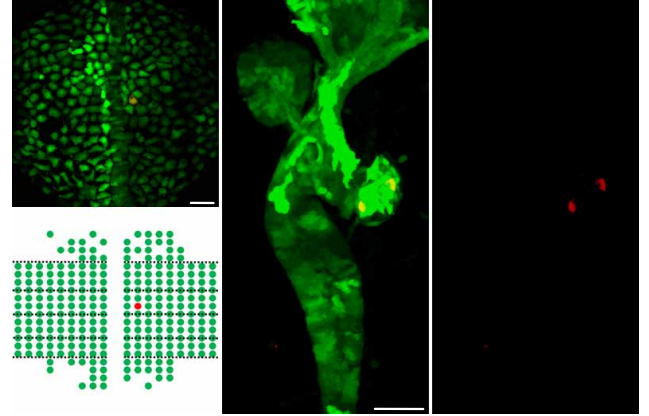

L-c2s23 (n=5)

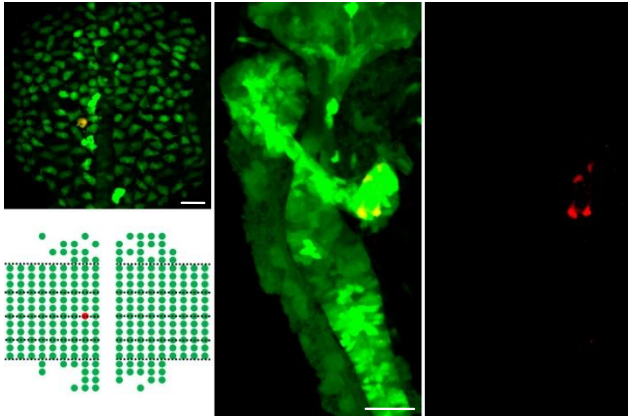

R-c2s23 (n=5)

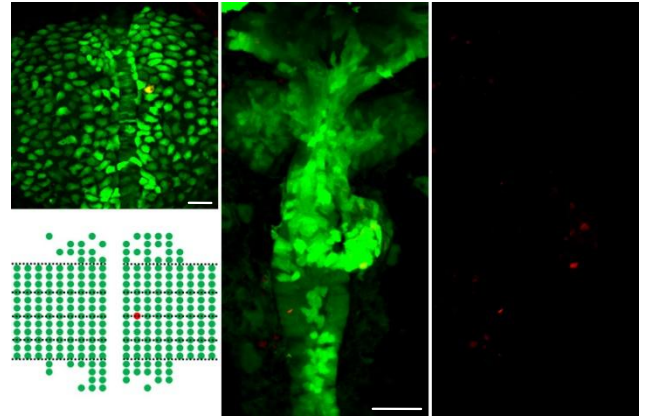

L-c2s3r1 (n=6)

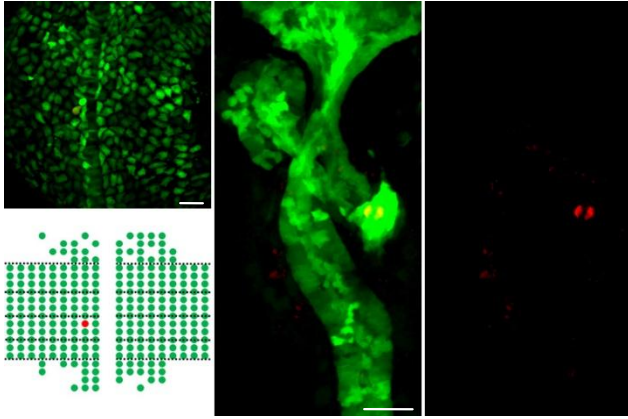

R-c2s3r1 (n=7)

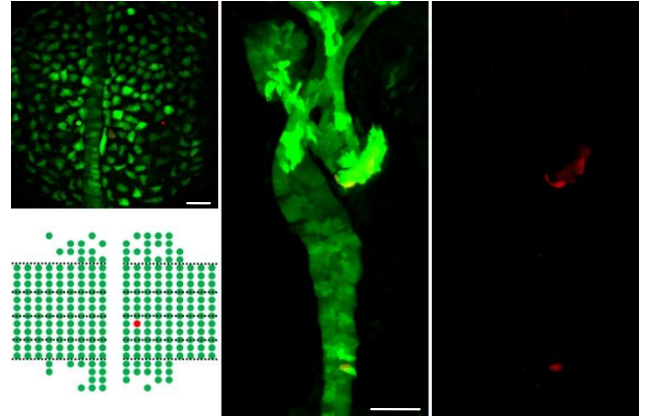

L-c2s3r2 (n=5)

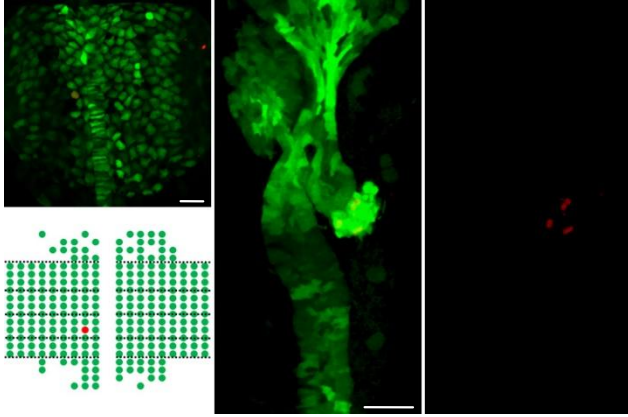

R-c2s3r2 (n=10)

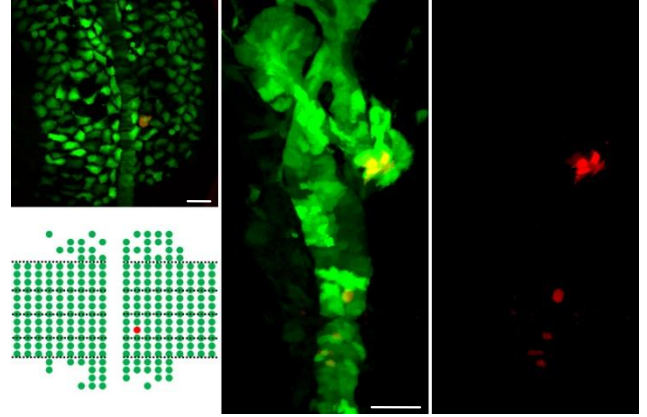

L-c2s34 (n=8)

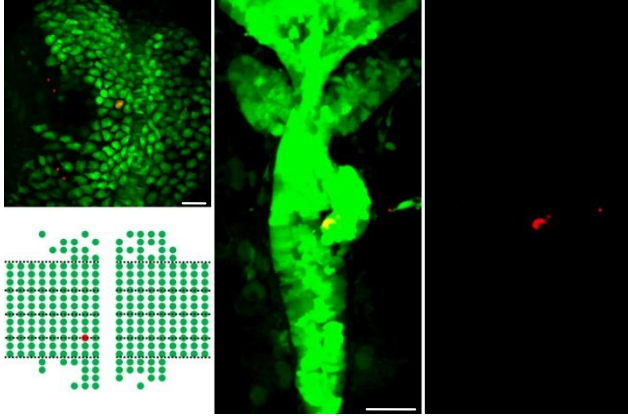

R-c2s34 (n=10)

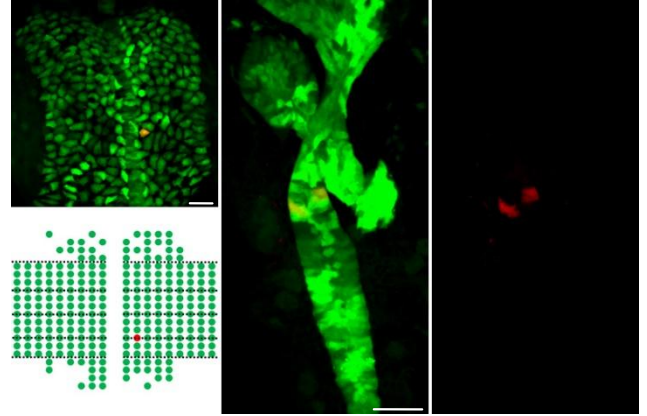

L-c2s4r1 (n=8)

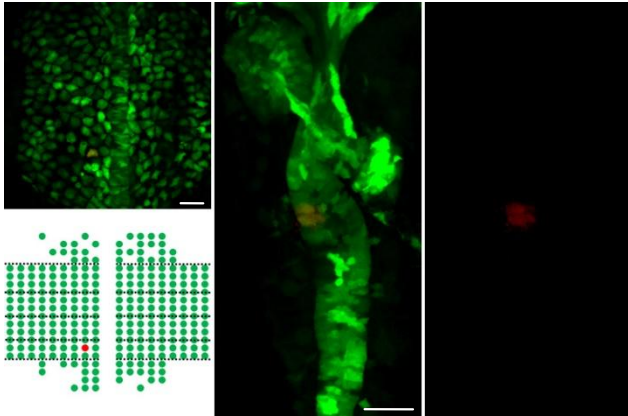

R-c2s4r1 (n=5)

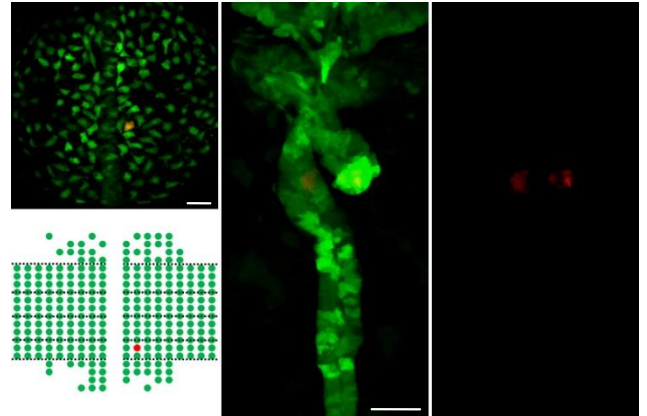

L-c2s4r2 (n=7)

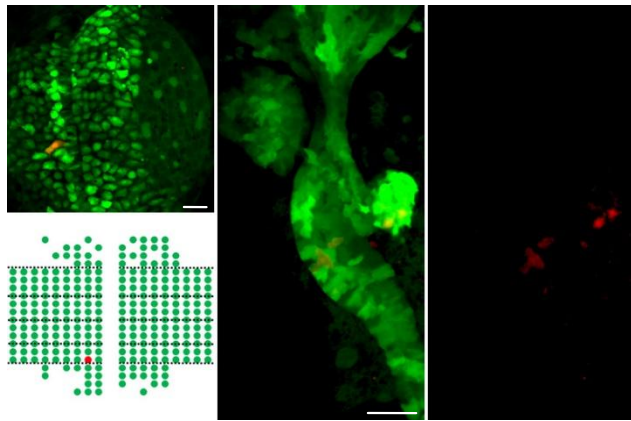

R-c2s4r2 (n=9)

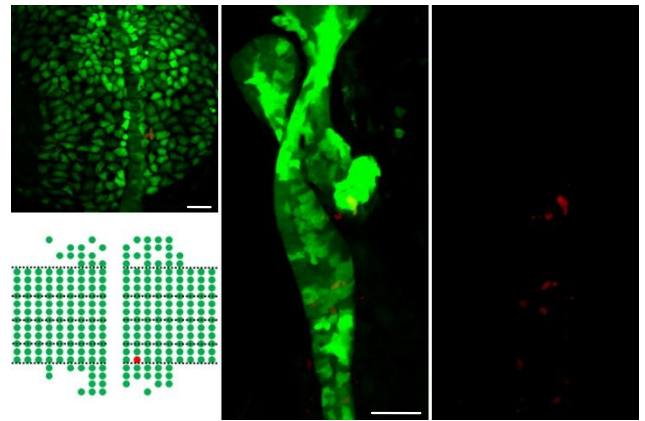

L-c3s1r1 (n=8)

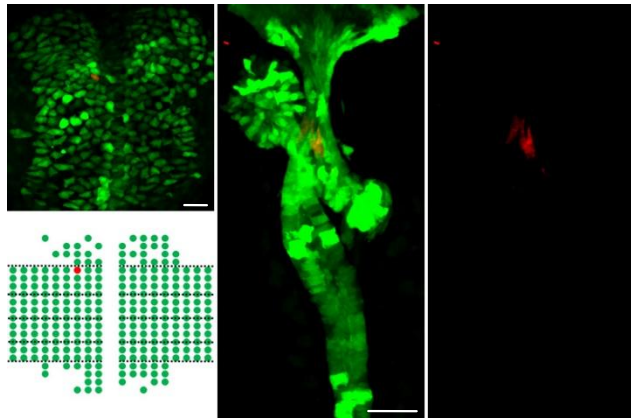

R-c3s1r1 (n=8)

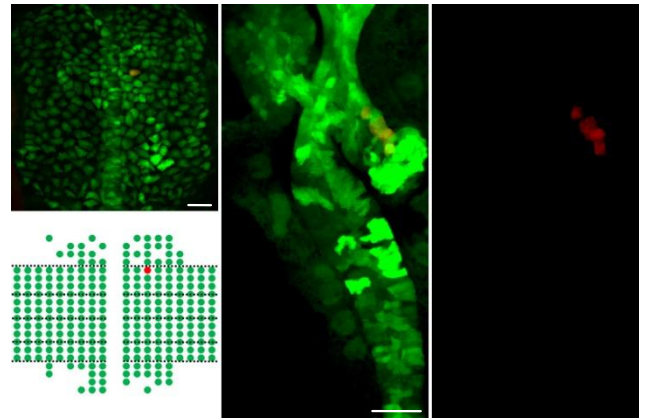

L-c3s1r2 (n=6)

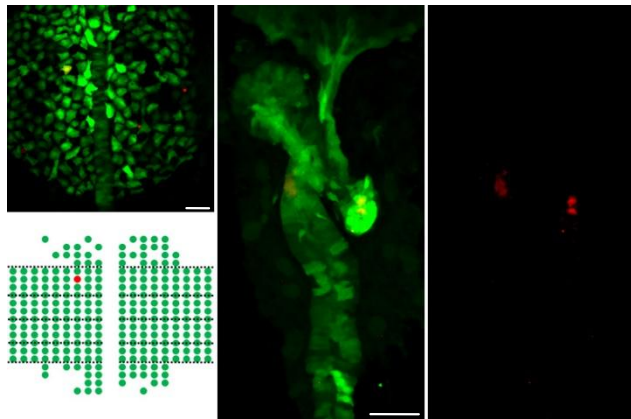

R-c3s1r2 (n=5)

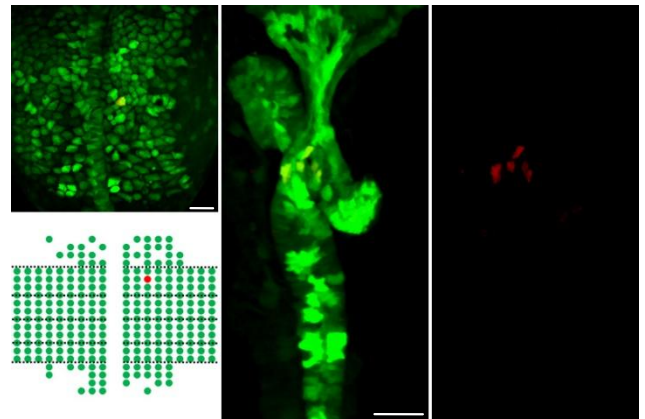

L-c3s1r3 (n=6)

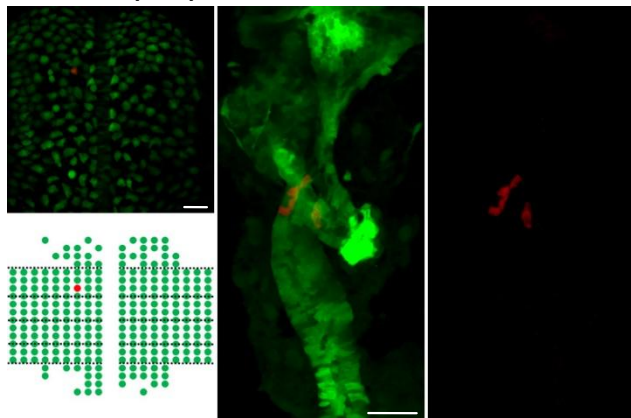

R-c3s1r3 (n=6)

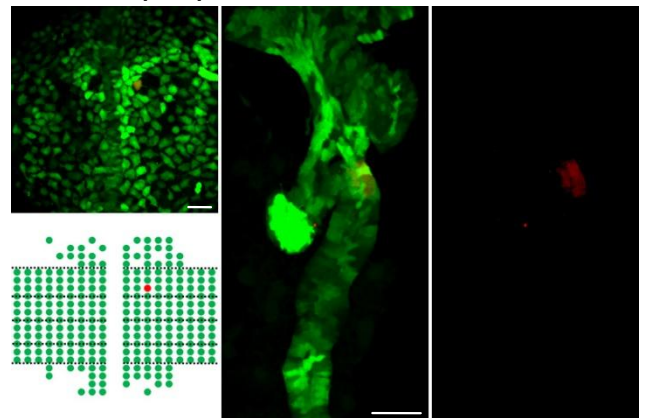

L-c3s12 (n=10)

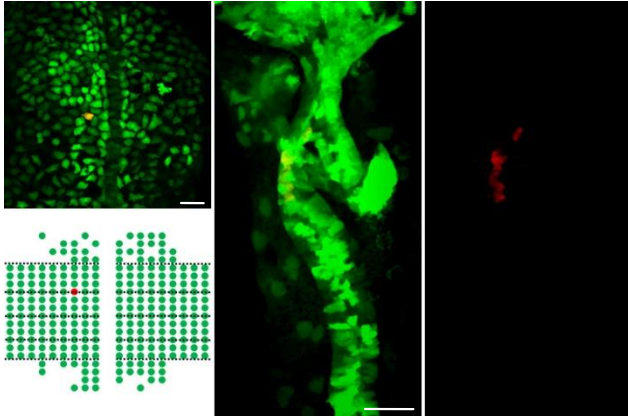

R-c3s12 (n=5)

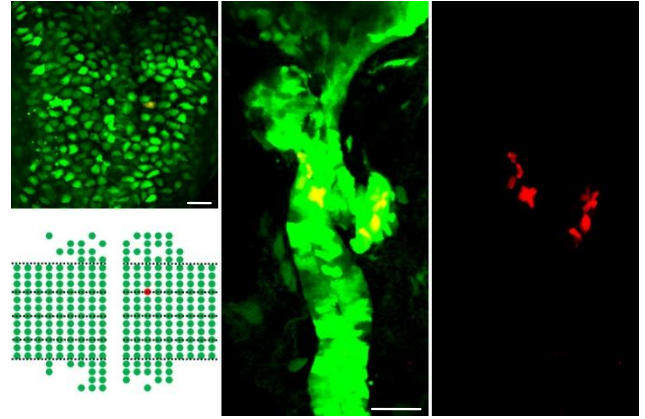

L-c3s2r1 (n=5)

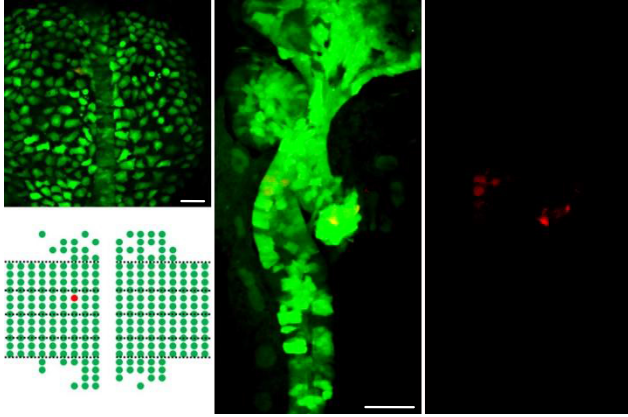

R-c3s2r1 (n=6)

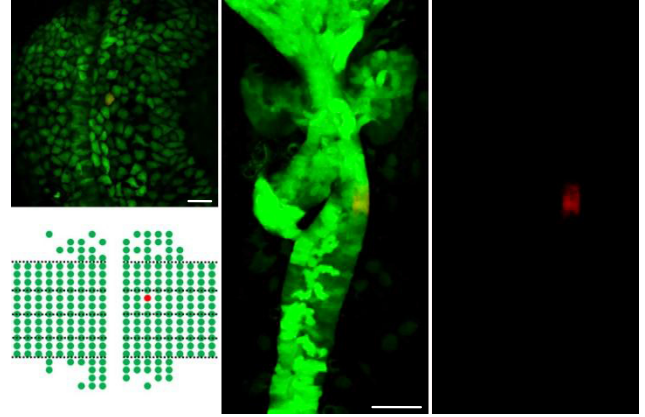

L-c3s2r2 (n=6)

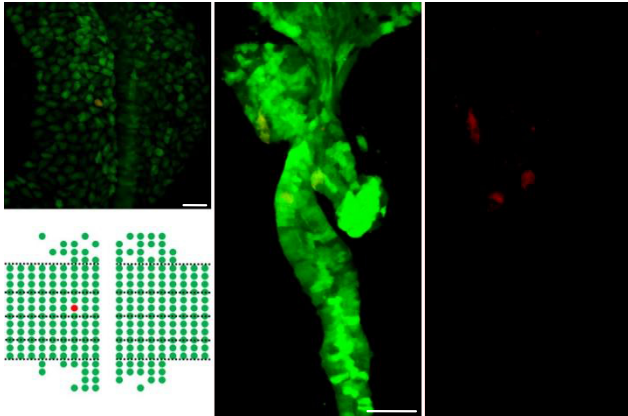

R-c3s2r2 (n=13)

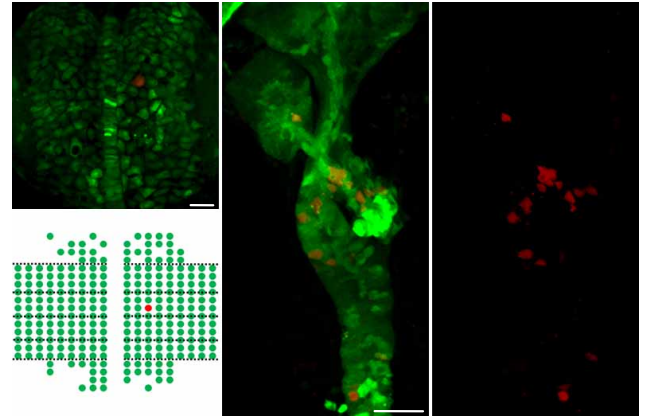

L-c3s23 (n=5)

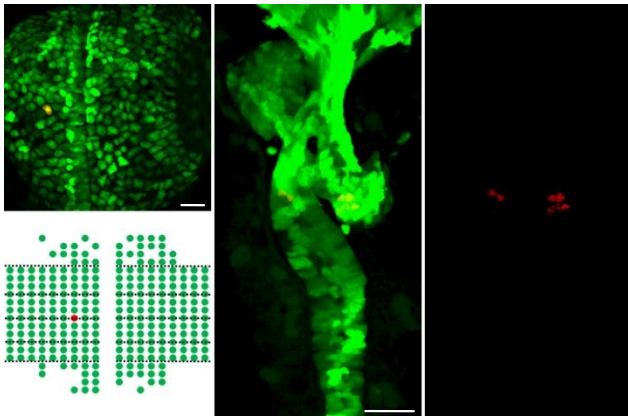

R-c3s23 (n=5)

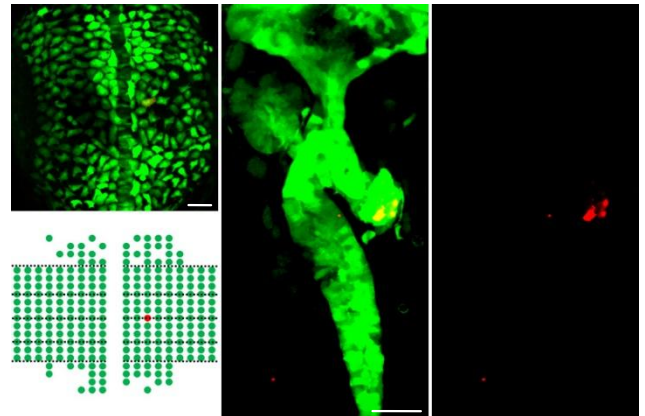



L-c3s3r1 (n=9)

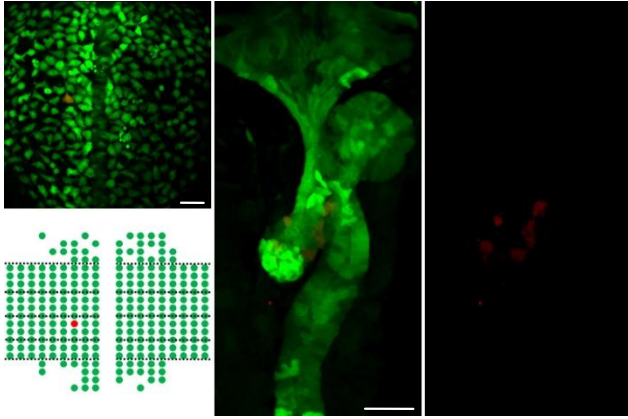

R-c3s3r1 (n=8)

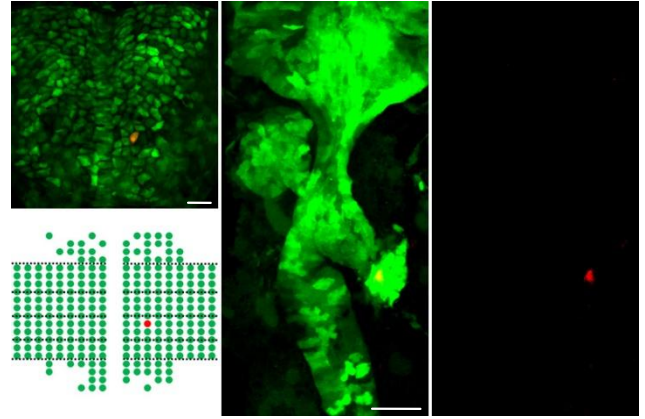

L-c3s3r2 (n=7)

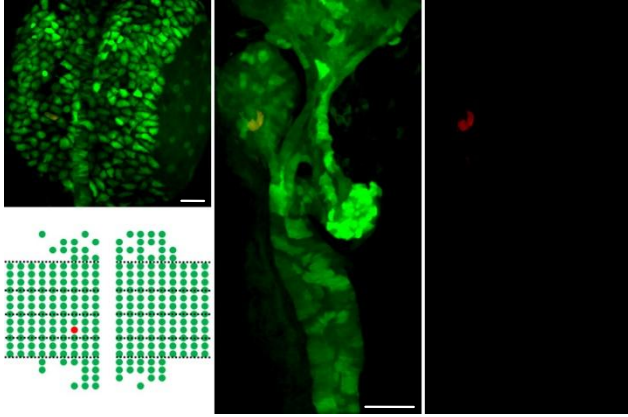

R-c3s3r2 (n=5)

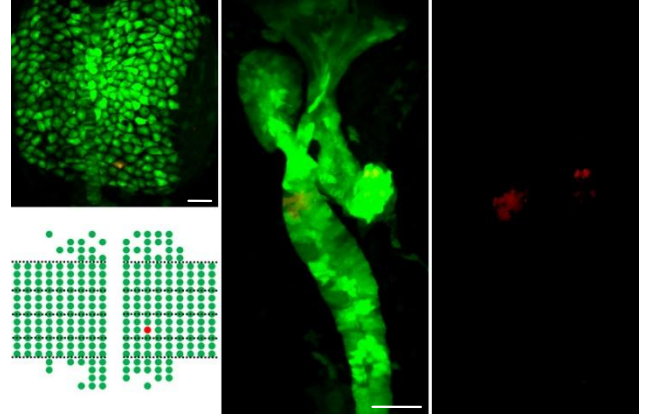

L-c3s34 (n=8)

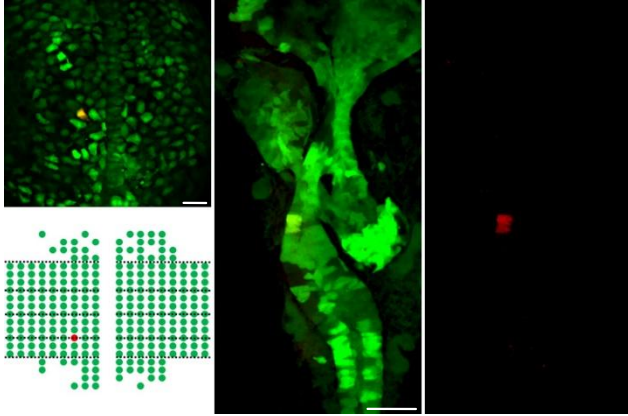

R-c3s34 (n=5)

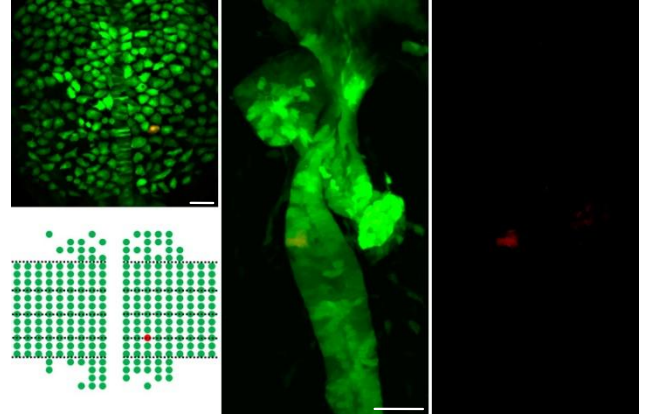

L-c3s4r1 (n=5)

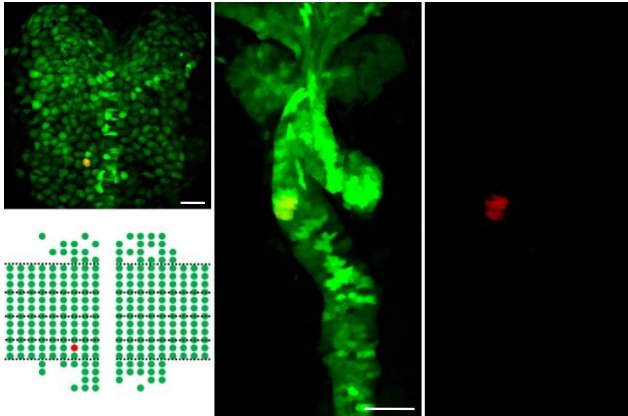

R-c3s4r1 (n=8)

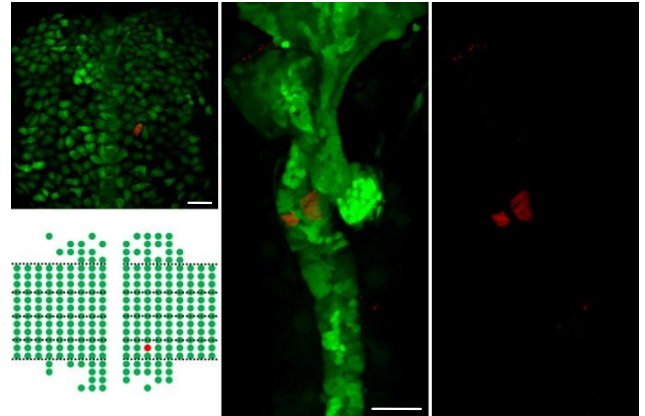

L-c3s4r2 (n=5)

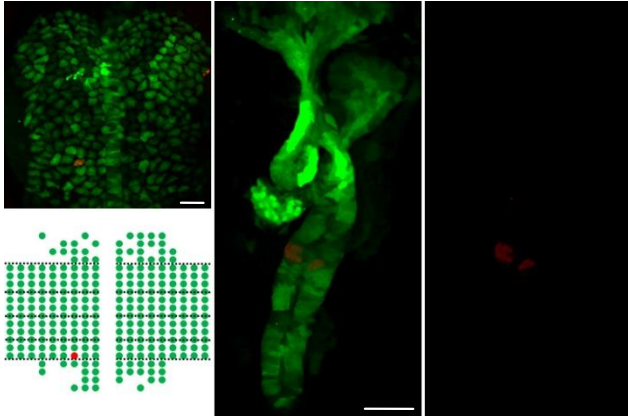

R-c3s4r2 (n=5)

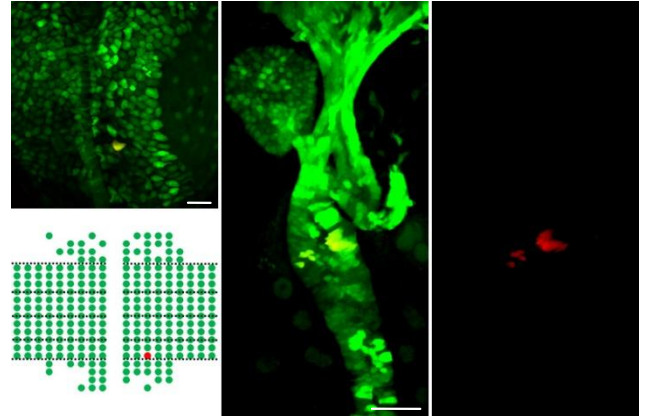

L-c4s1r1 (n=8)

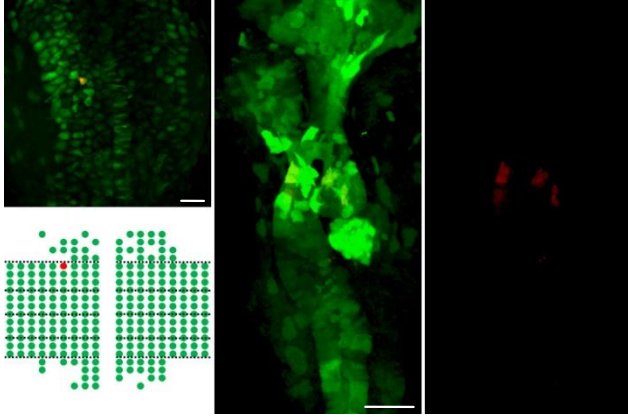

R-c4s1r1 (n=8)

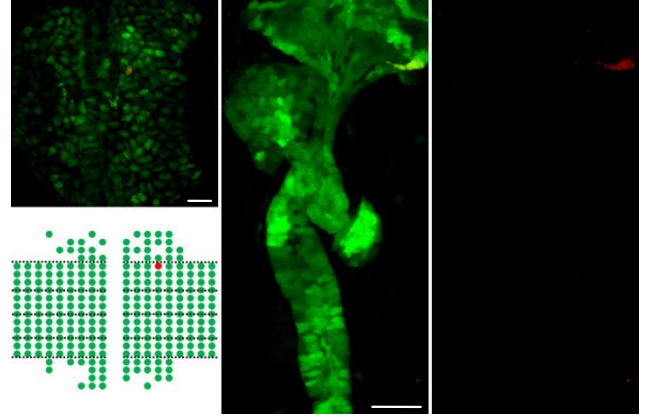

L-c4s1r2 (n=5)

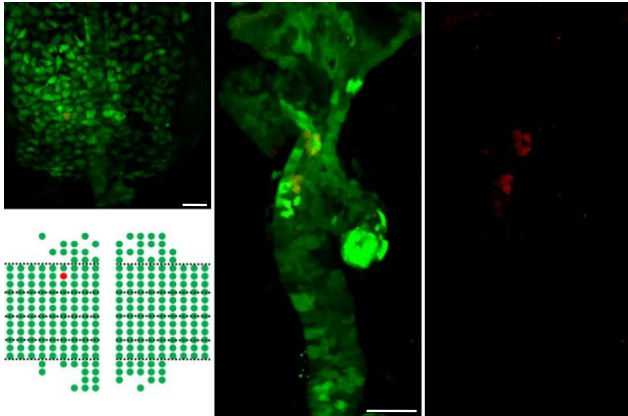

R-c4s1r2 (n=8)

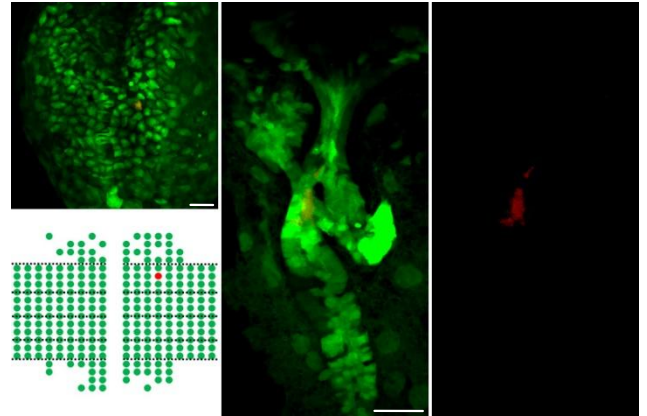

L-c4s1r3 (n=5)

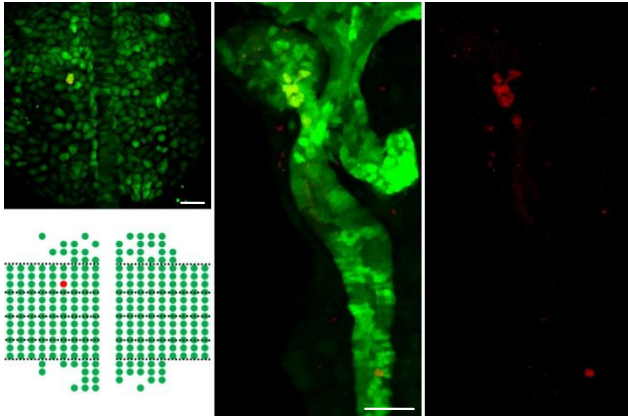

R-c4s1r3 (n=6)

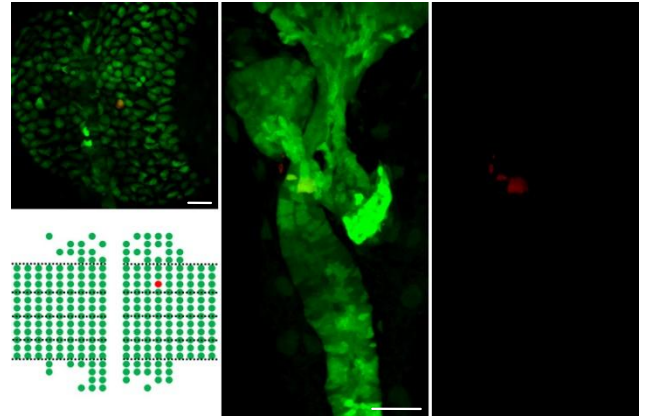

L-c4s12 (n=8)

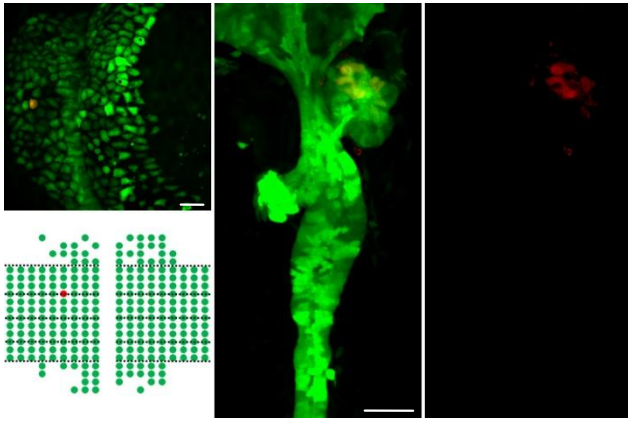

R-c4s12 (n=5)

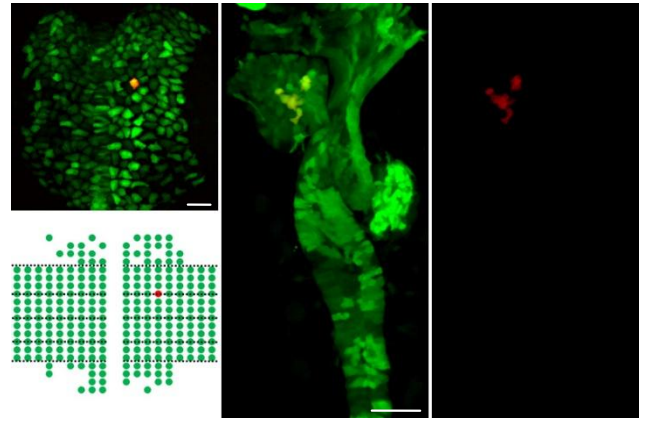

L-c4s2r1 (n=8)

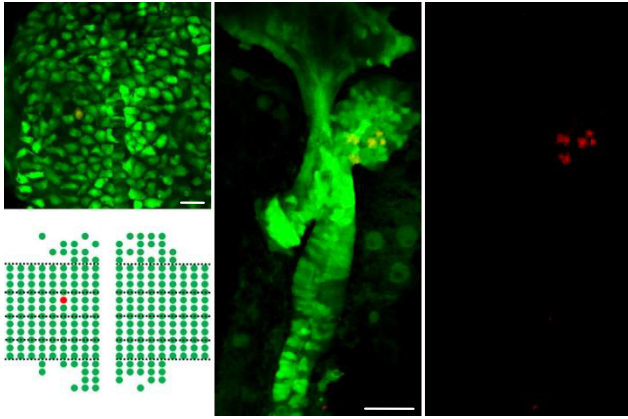

R-c4s2r1 (n=5)

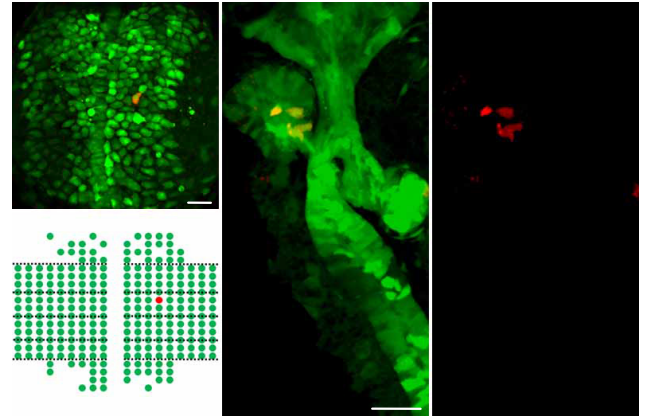

L-c4s2r2 (n=6)

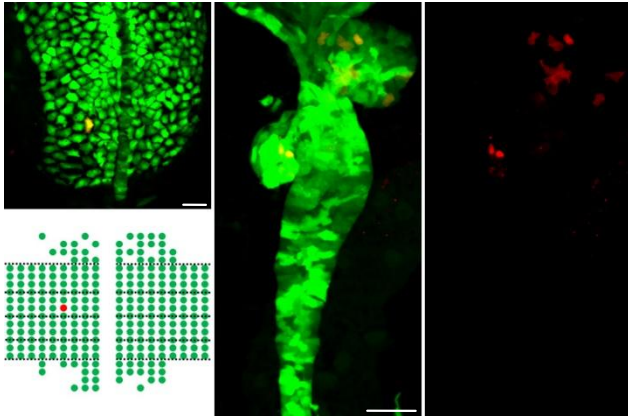

R-c4s2r2 (n=8)

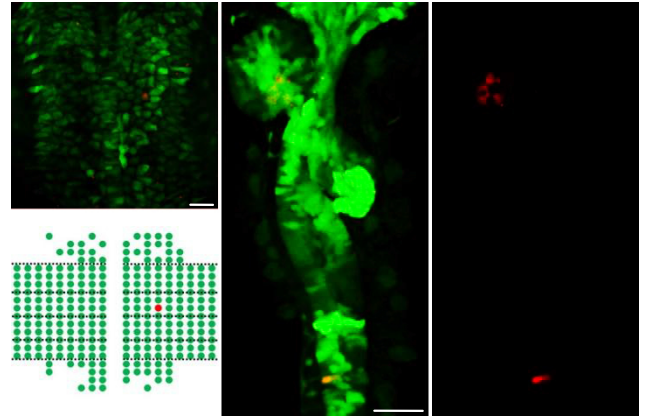

L-c4s23 (n=7)

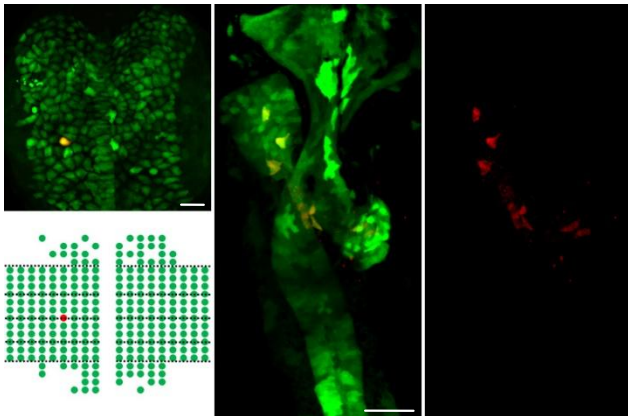

R-c4s23 (n=8)

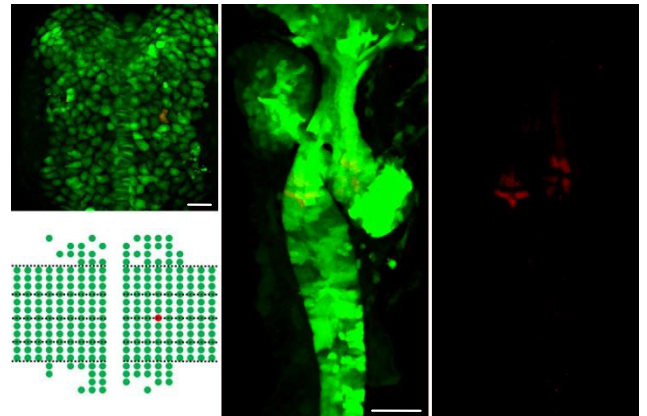



L-c4s4r2 (n=8)

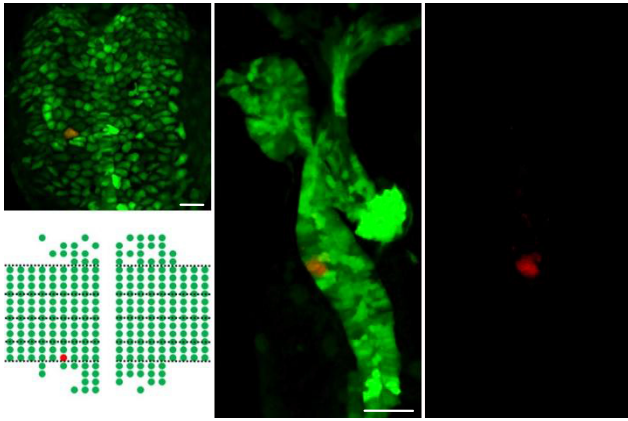

R-c4s4r2 (n=7)

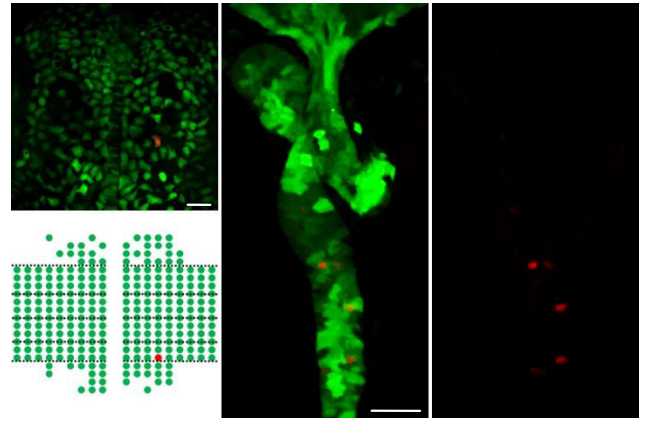

L-c5s1r1 (n=8)

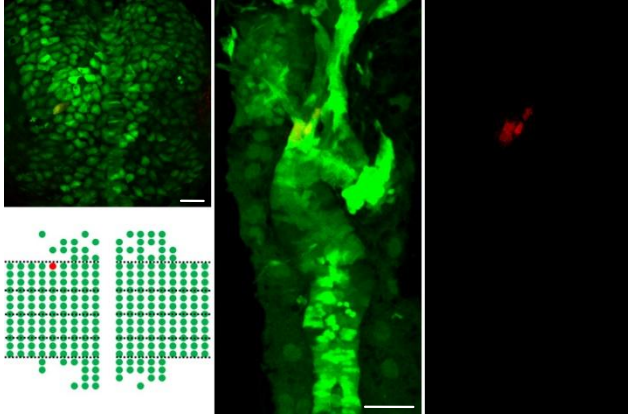

R-c5s1r1 (n=7)

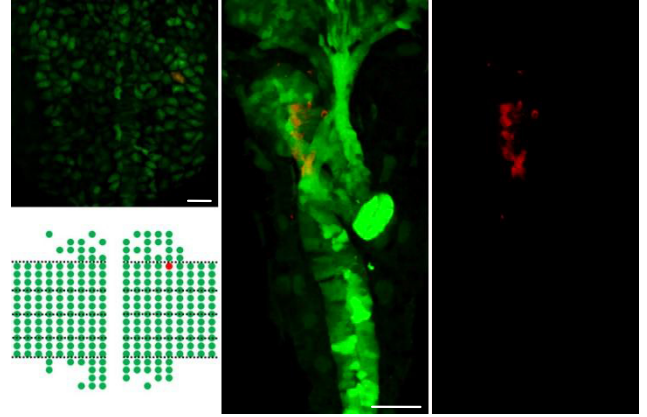

L-c5s1r2 (n=9)

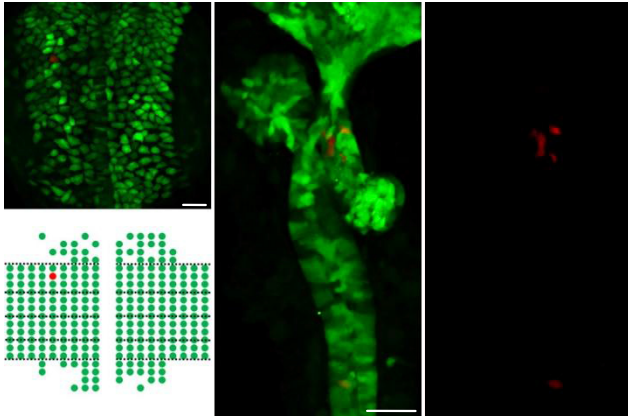

R-c5s1r2 (n=5)

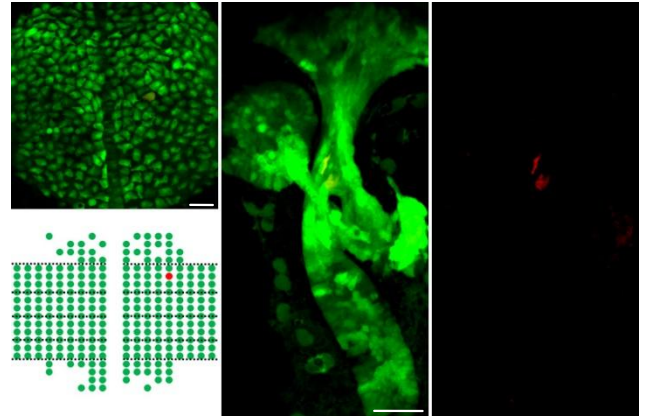

L-c5s1r3 (n=8)

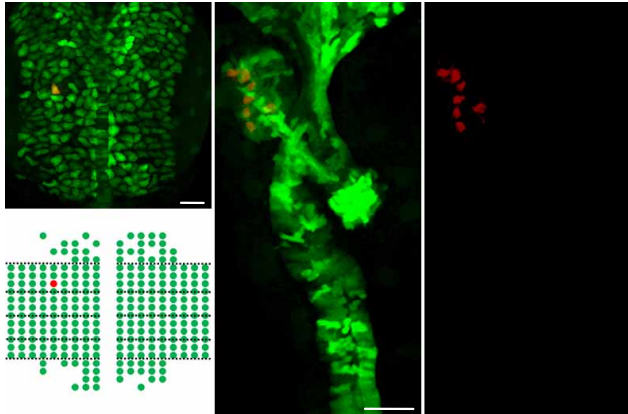

R-c5s1r3 (n=5)

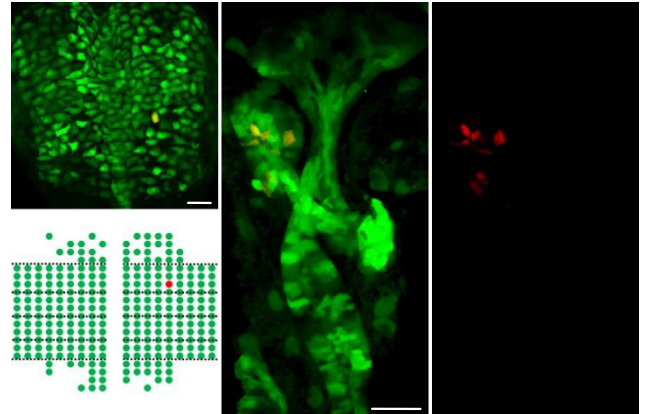

L-c5s12 (n=7)

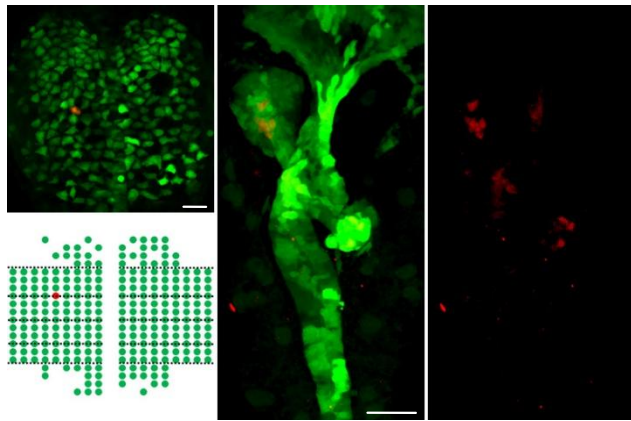

R-c5s12 (n=5)

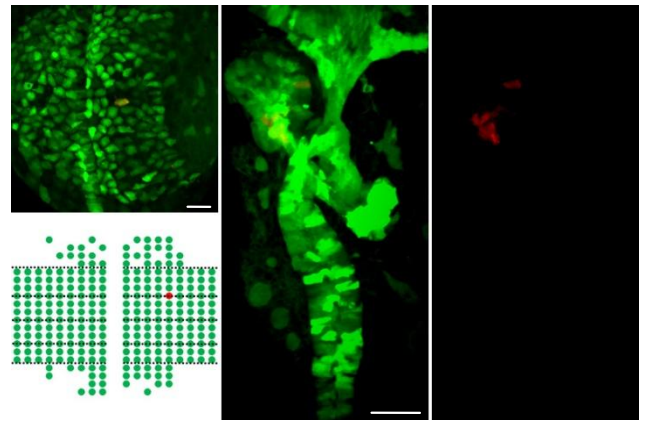

L-c5s2r1 (n=8)

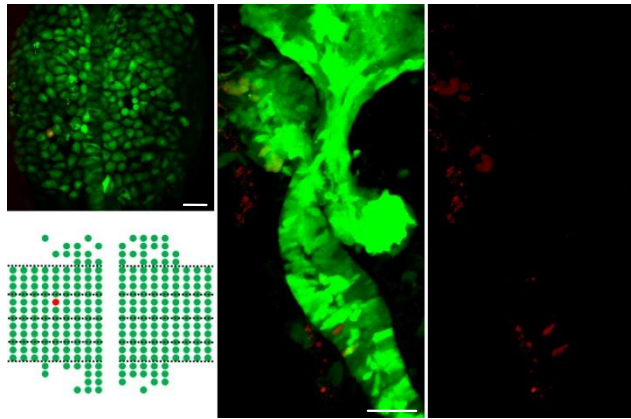

R-c5s2r1 (n=5)

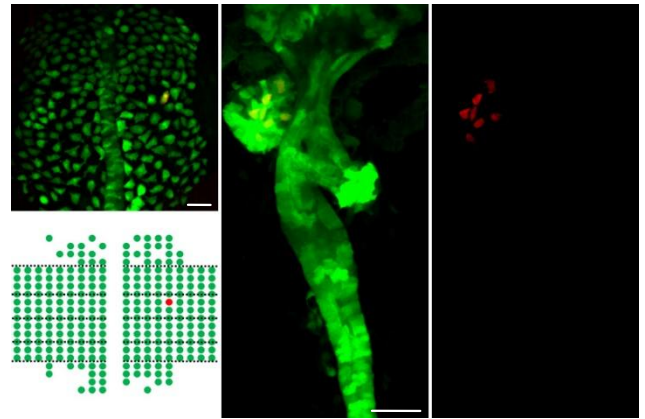

L-c5s2r2 (n=8)

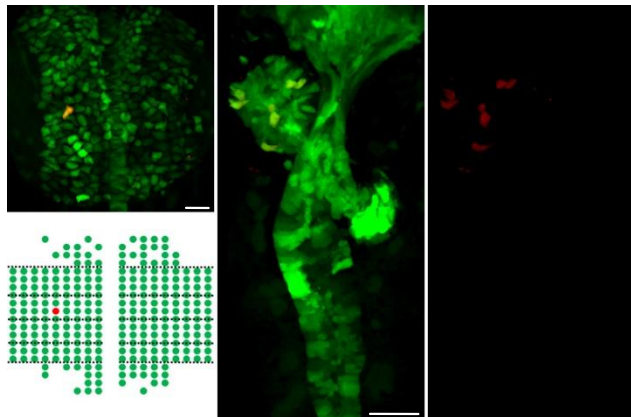

R-c5s2r2 (n=5)

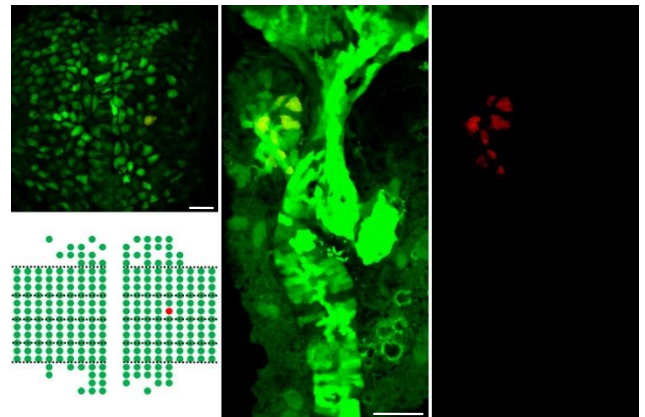

L-c5s23 (n=6)

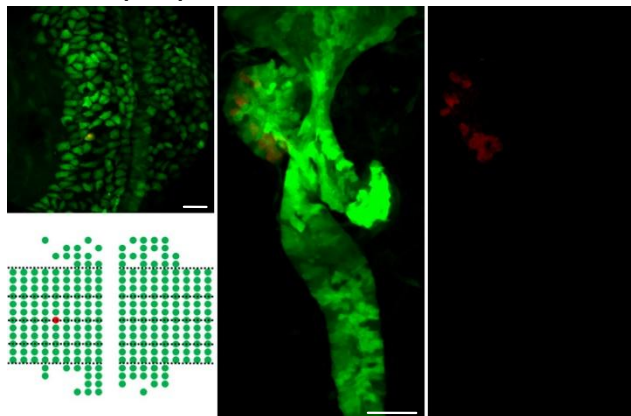

R-c5s23 (n=5)

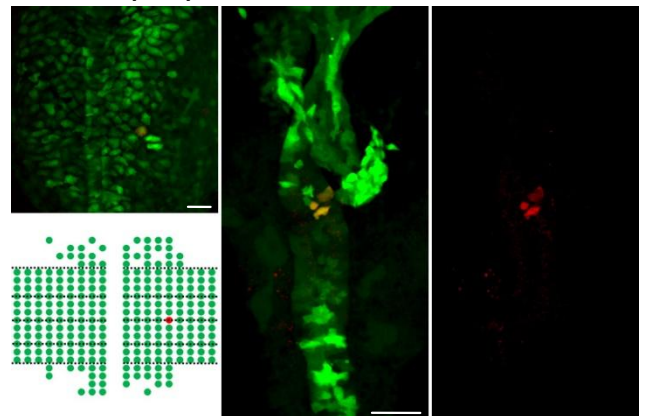

L-c5s3r1 (n=9)

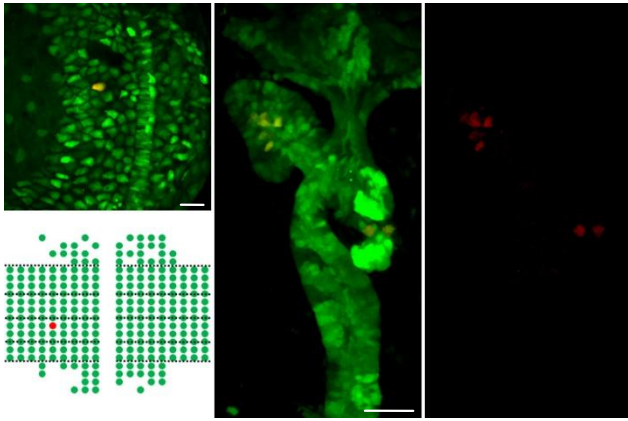

R-c5s3r1 (n=7)

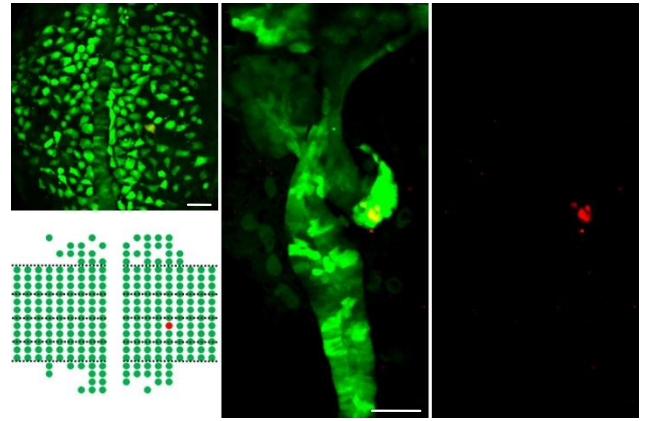

L-c5s3r2 (n=9)

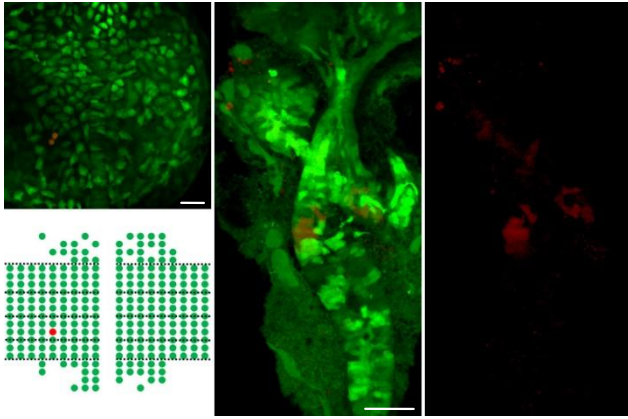

R-c5s3r2 (n=8)

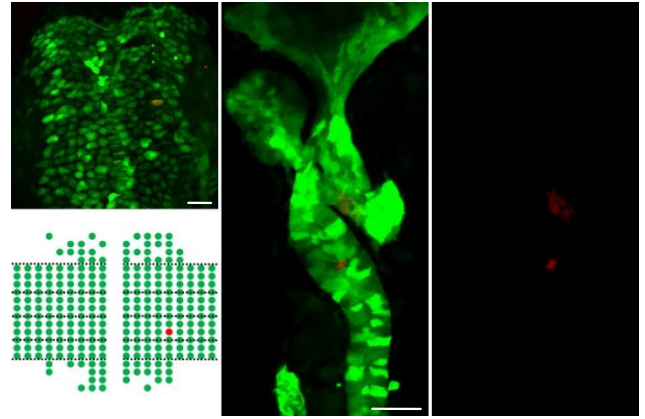

L-c5s34 (n=6)

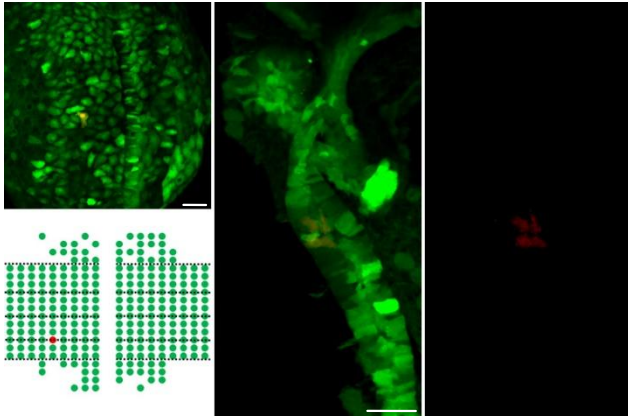

R-c5s34 (n=5)

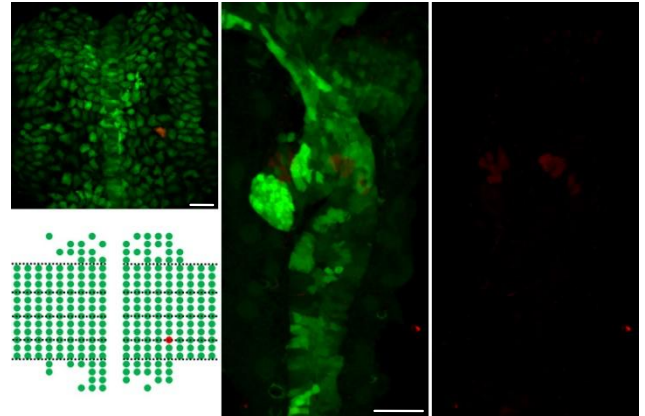

L-c5s4r1 (n=5)

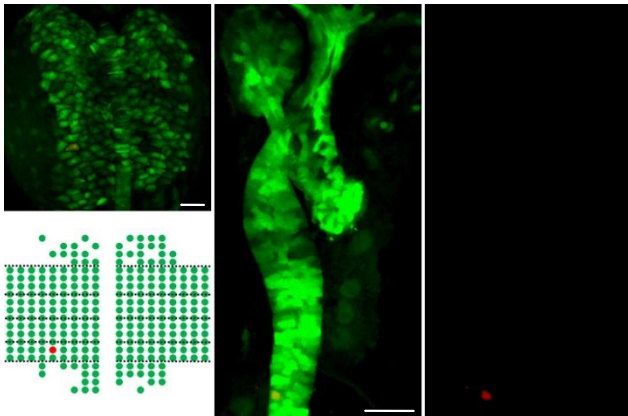

R-c5s4r1 (n=8)

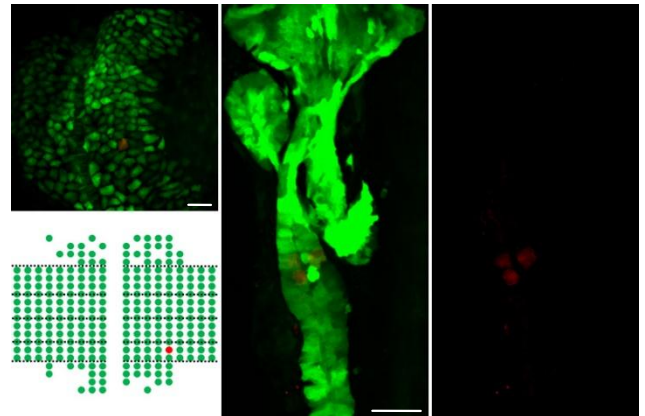

L-c5s4r2 (n=6)

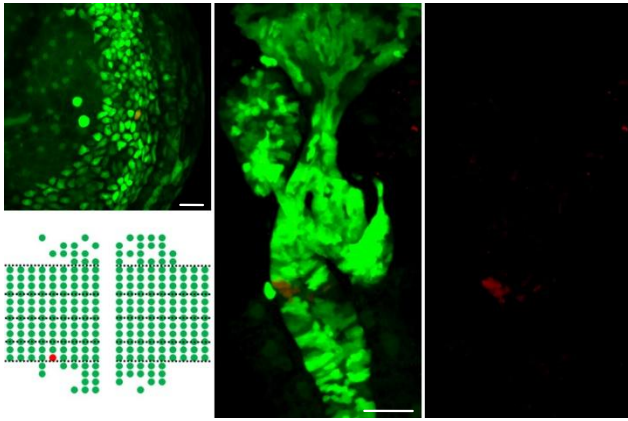

R-c5s4r2 (n=8)

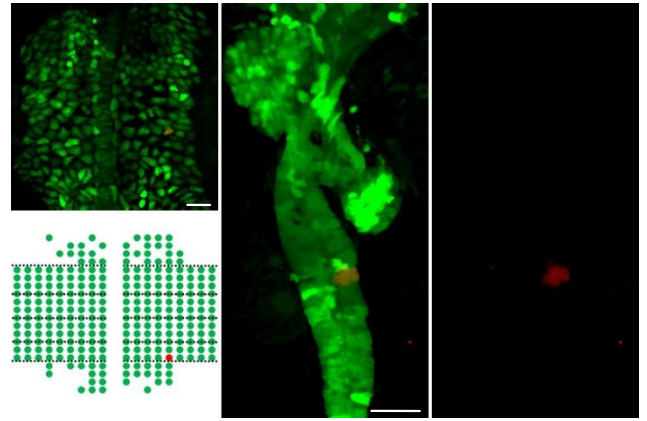

L-c6s1r1 (n=5)

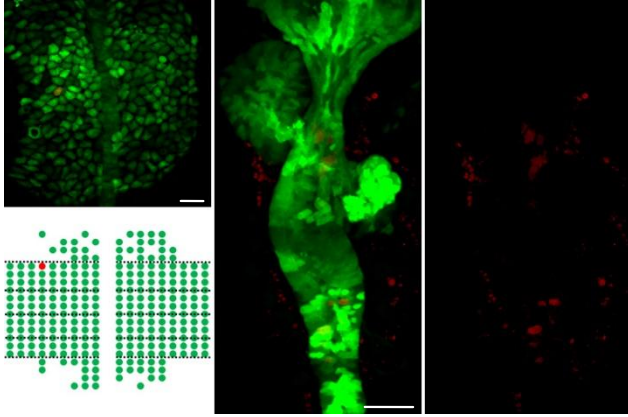

R-c6s1r1 (n=5)

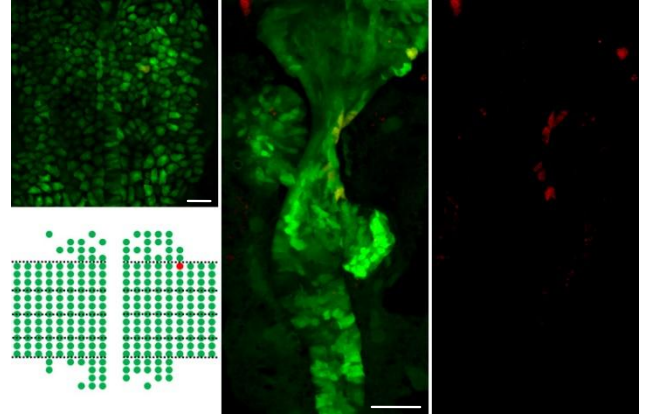

L-c6s1r2 (n=8)

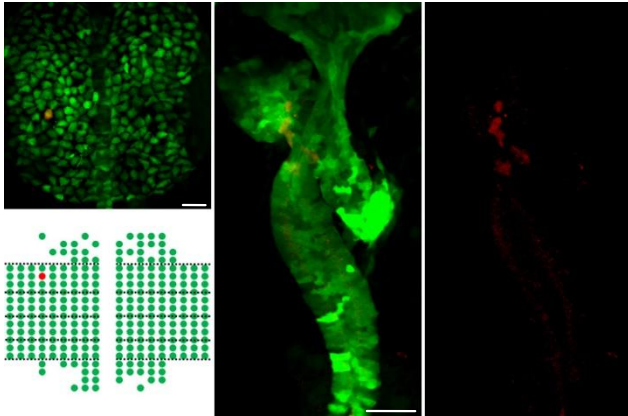

R-c6s1r2 (n=11)

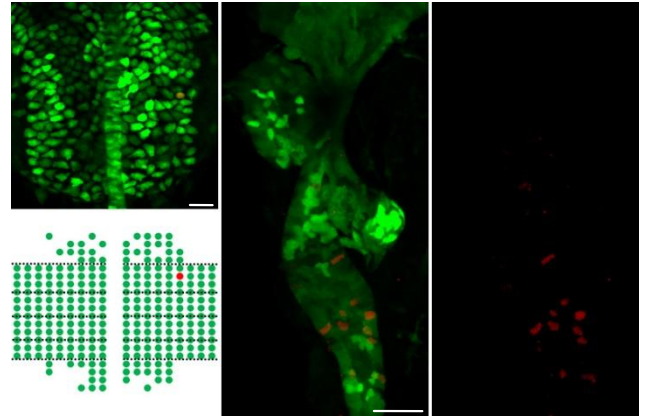

L-c6s1r3 (n=8)

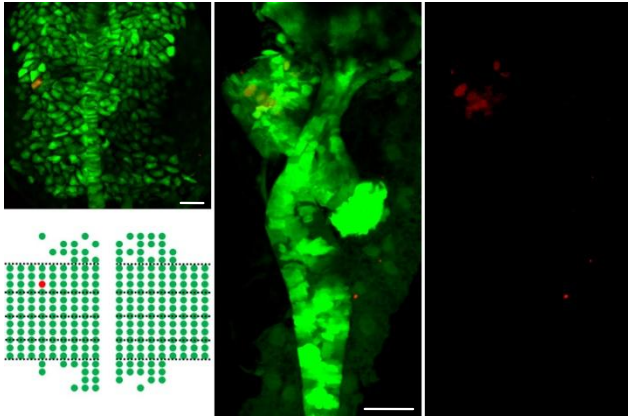

R-c6s1r3 (n=5)

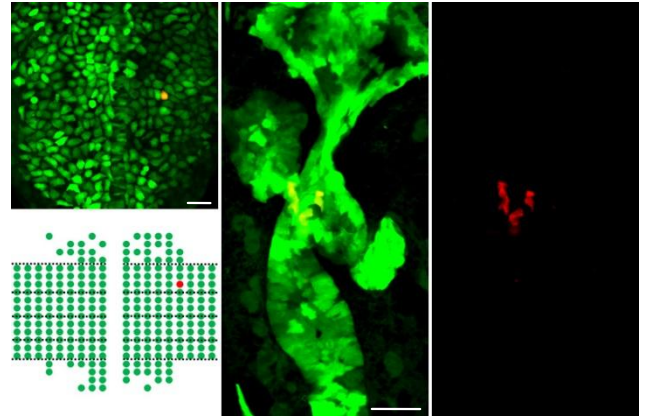



L-c6s12 (n=8)

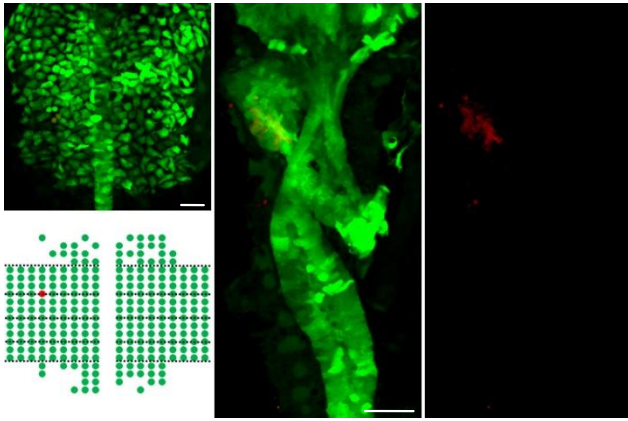

R-c6s12 (n=7)

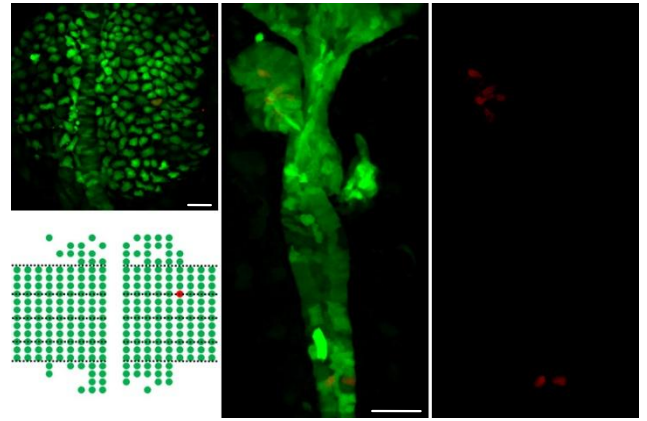

L-c6s2r1 (n=8)

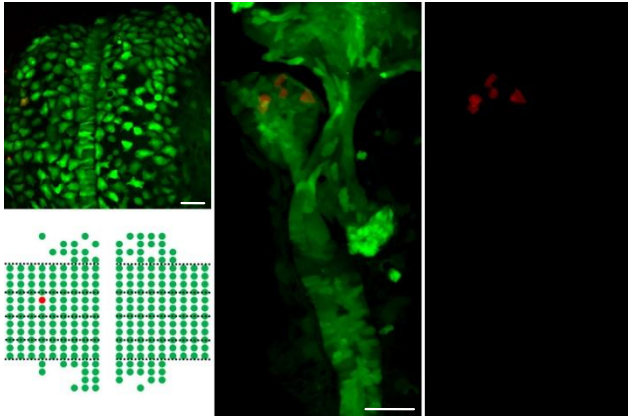

R-c6s2r1 (n=5)

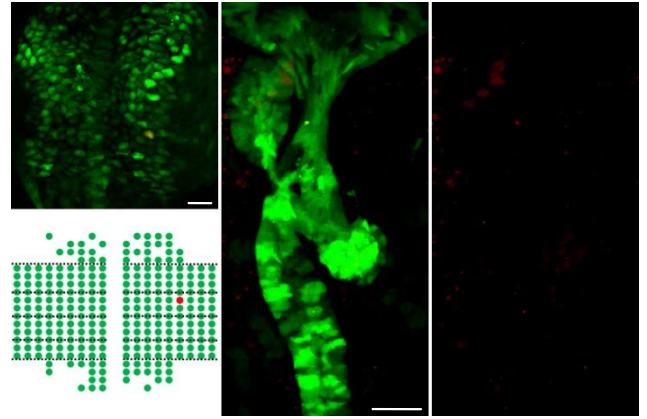

L-c6s2r2 (n=5)

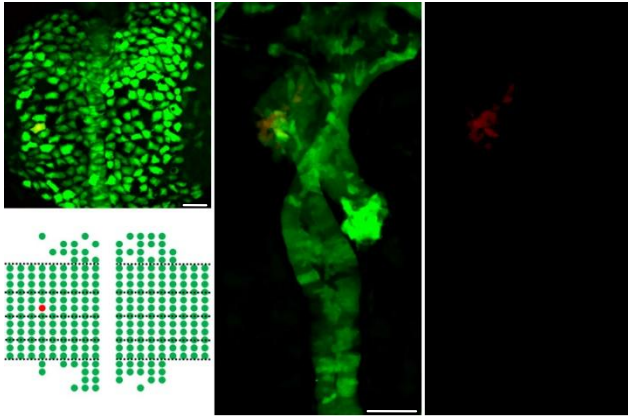

R-c6s2r2 (n=8)

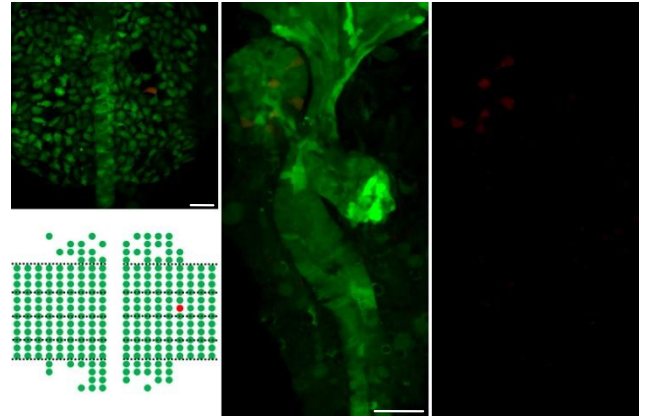

L-c6s23 (n=6)

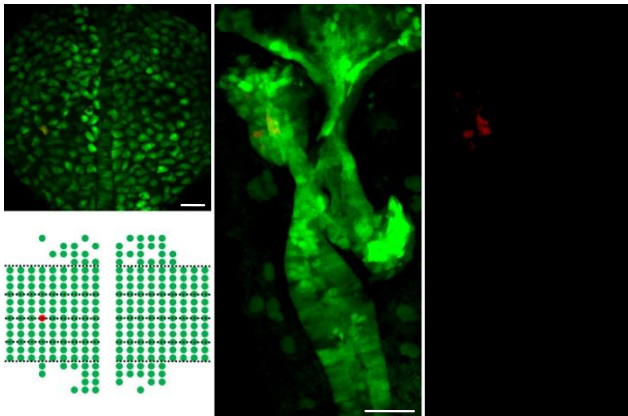

R-c6s23 (n=6)

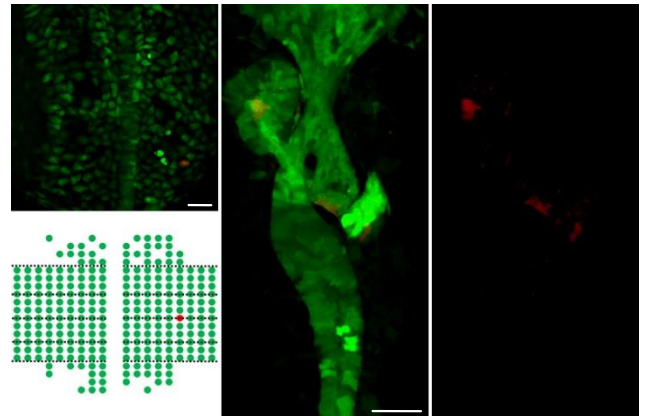



L-c6s4r2 (n=8)

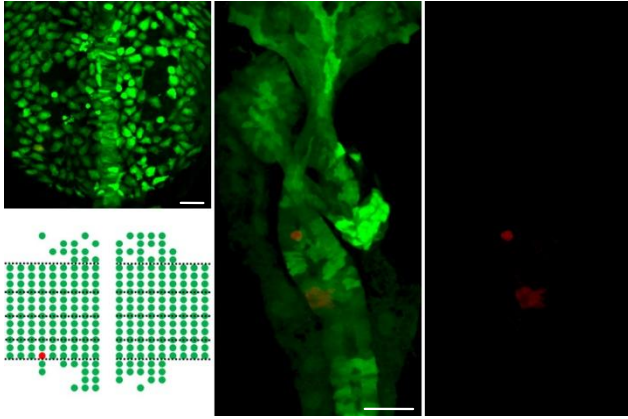

R-c6s4r2 (n=8)

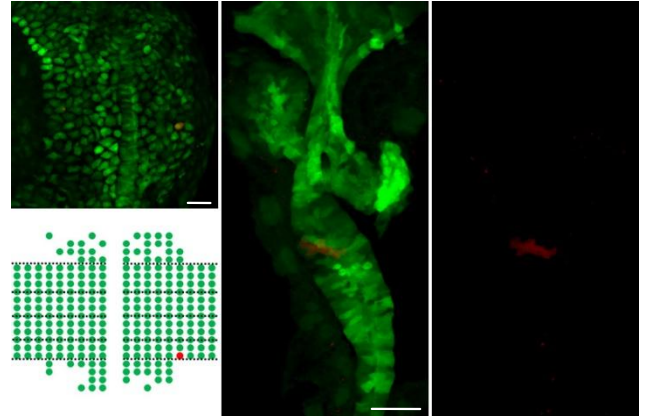

L-c7s1r1 (n=5)

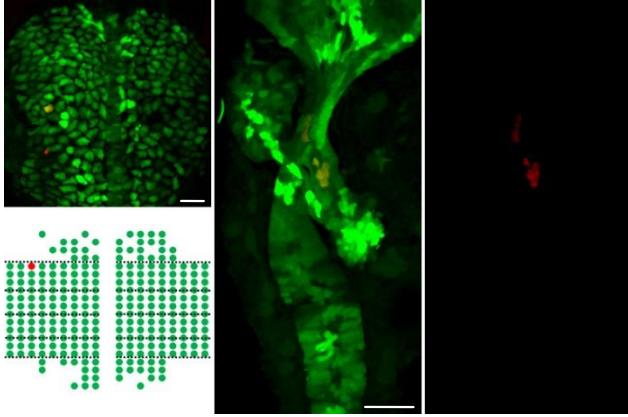

R-c7s1r1 (n=8)

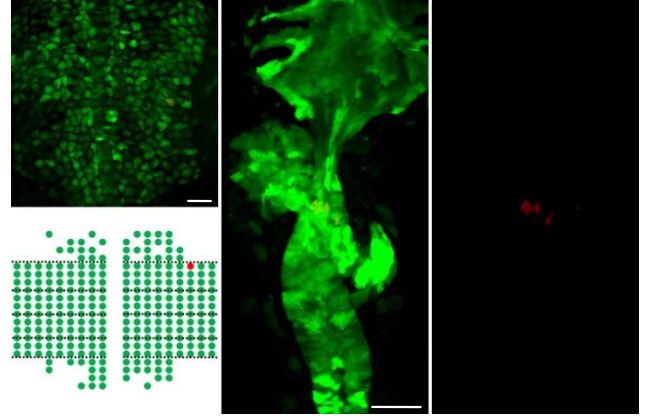

L-c7s1r2 (n=5)

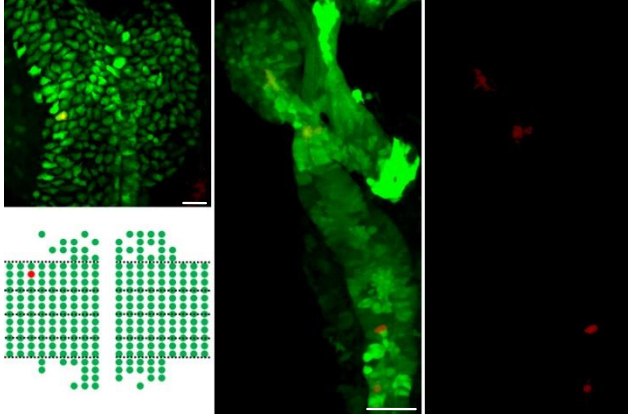

R-c7s1r2 (n=7)

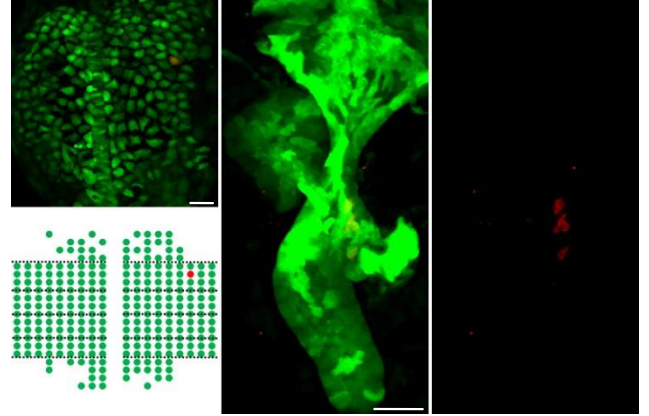

L-c7s1r3 (n=5)

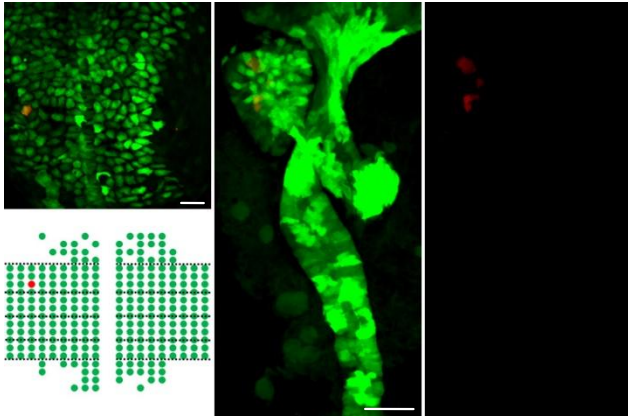

R-c7s1r3 (n=10)

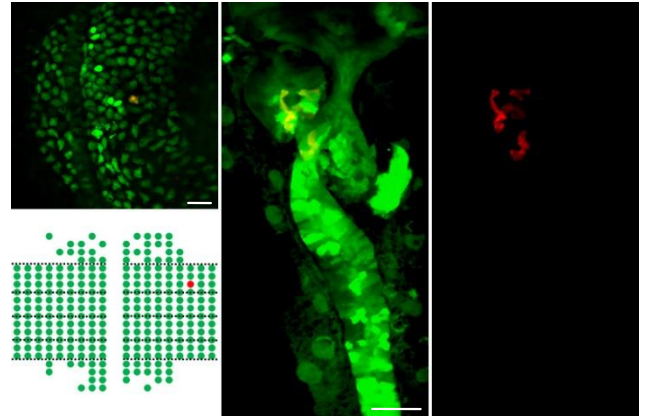

L-c7s12 (n=8)

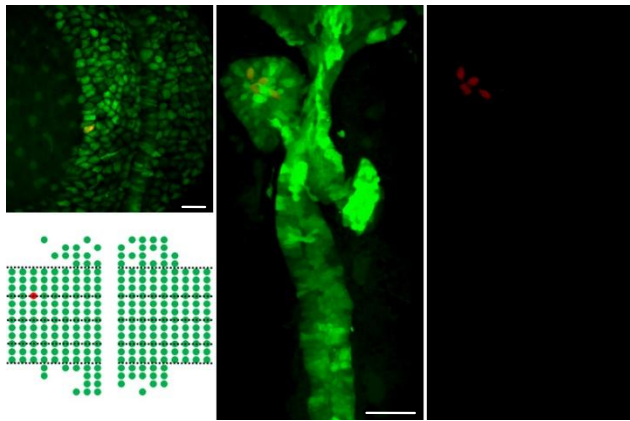

R-c7s12 (n=8)

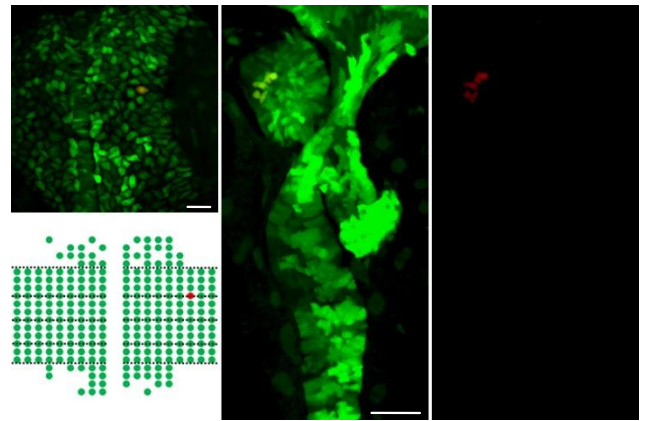

L-c7s2r1 (n=6)

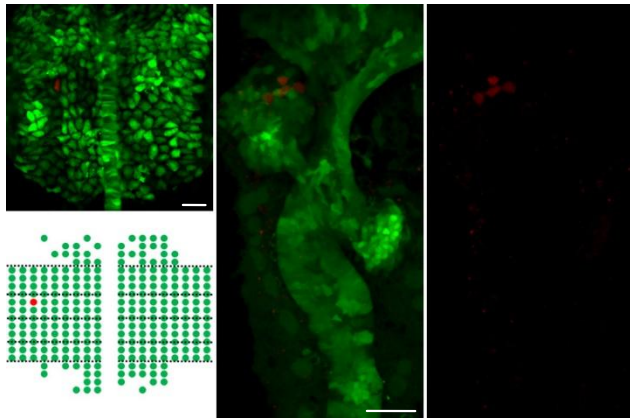

R-c7s2r1 (n=6)

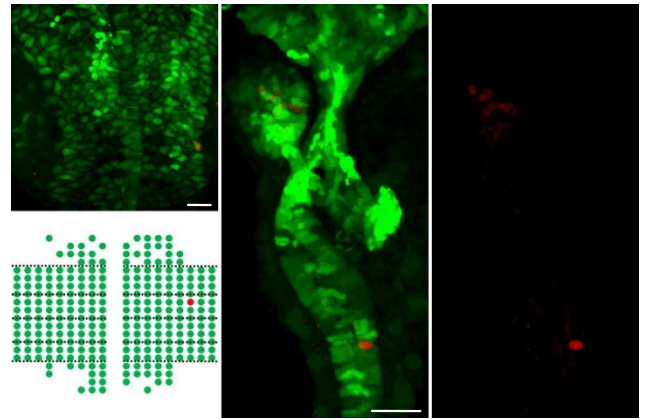

L-c7s2r2 (n=6)

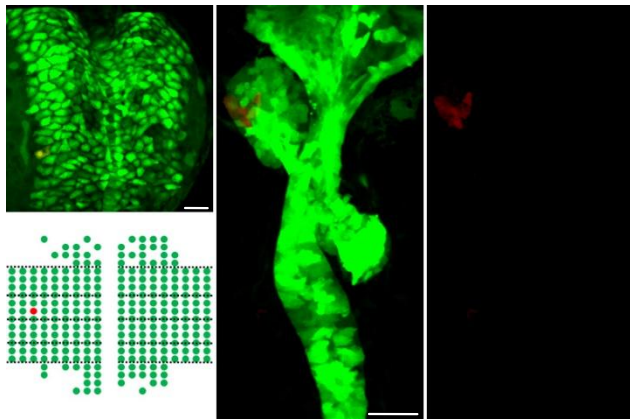

R-c7s2r2 (n=6)

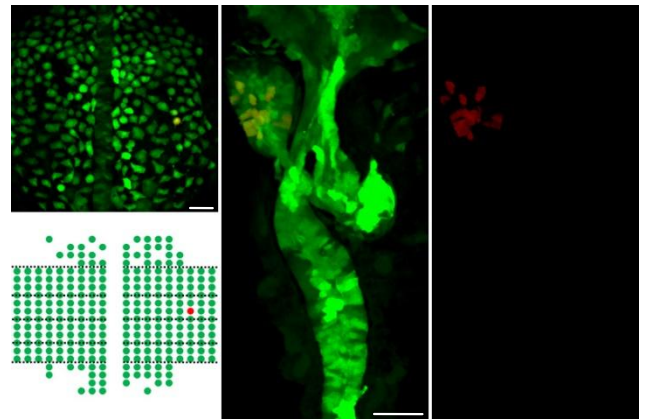

L-c7s23 (n=10)

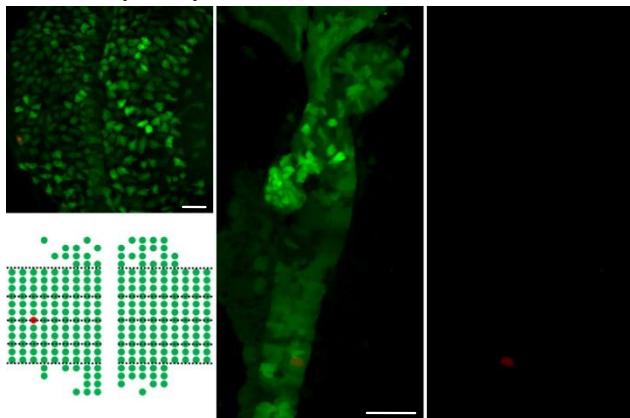

R-c7s23 (n=8)

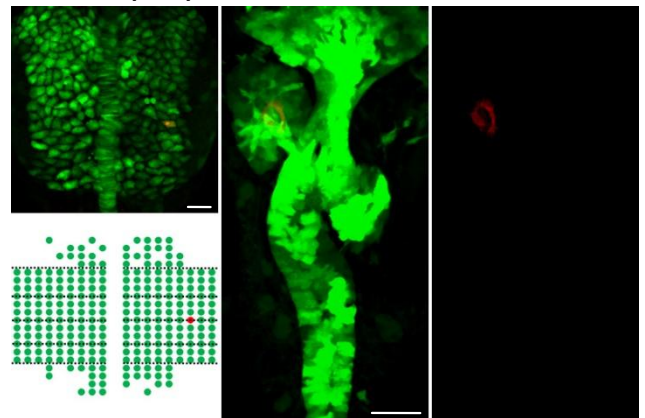

L-c7s3r1 (n=10)

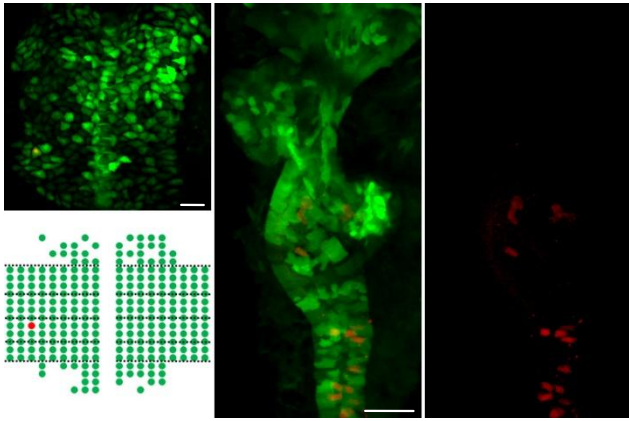

R-c7s3r1 (n=5)

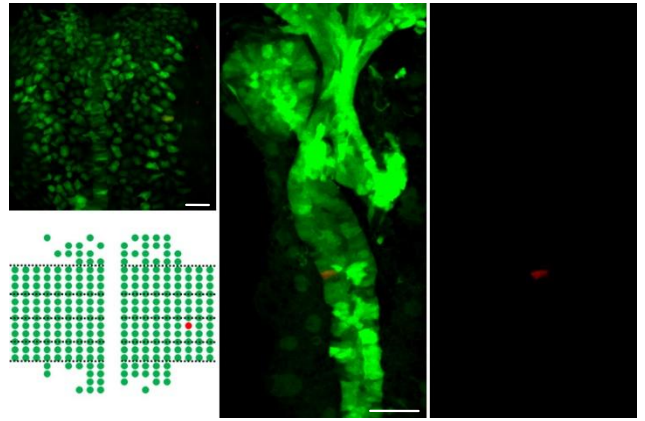

L-c7s3r2 (n=8)

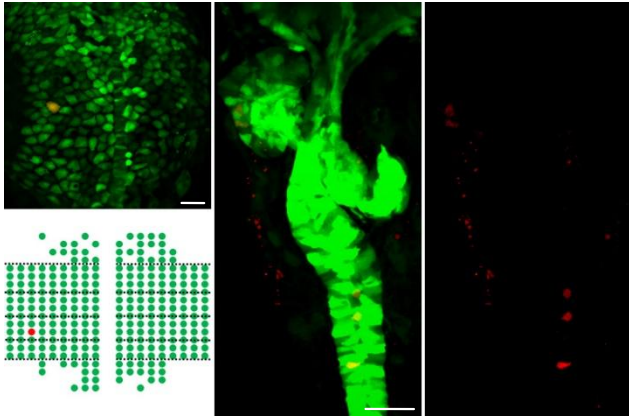

R-c7s3r2 (n=7)

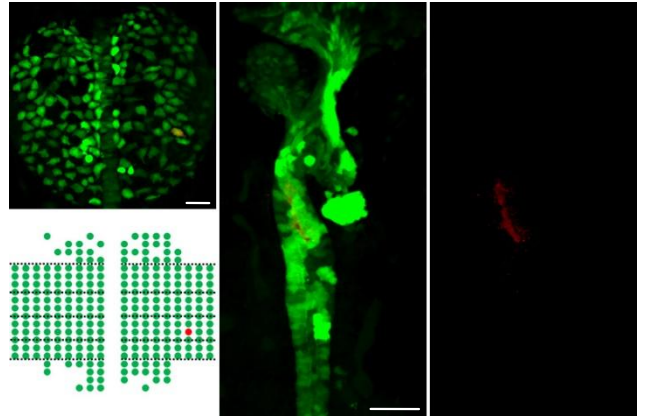

L-c7s34 (n=9)

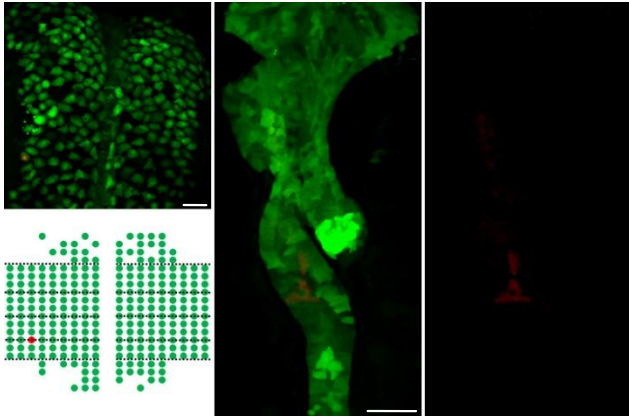

R-c7s34 (n=5)

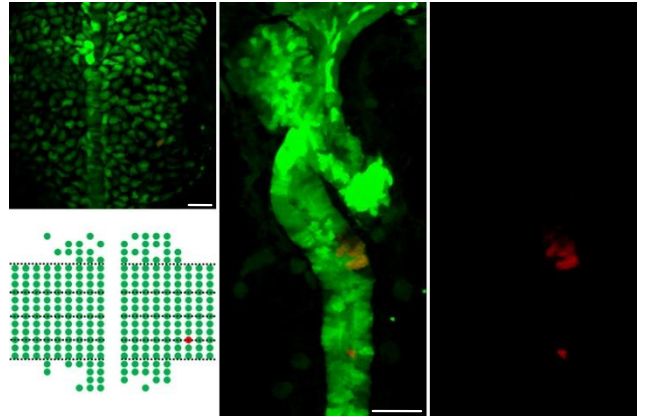

L-c7s4r1 (n=8)

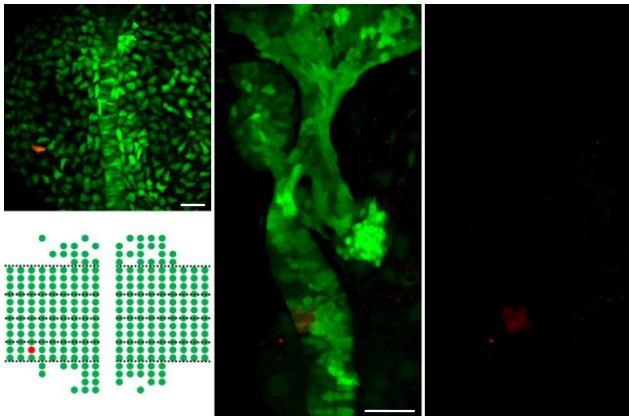

R-c7s4r1 (n=7)

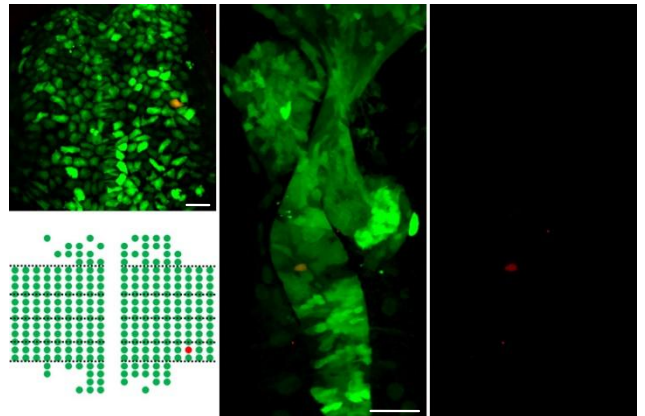

L-c7s4r2 (n=5)

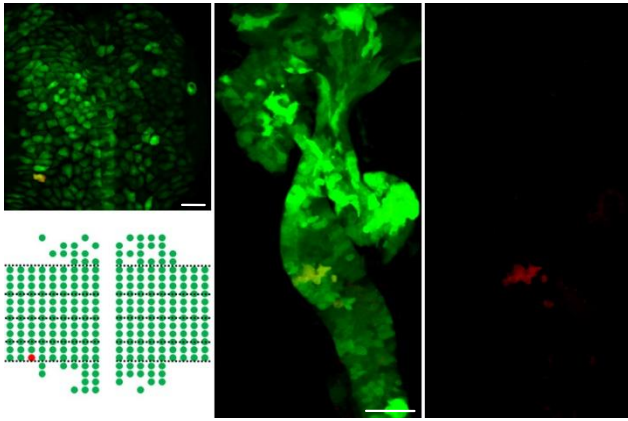

R-c7s4r2 (n=5)

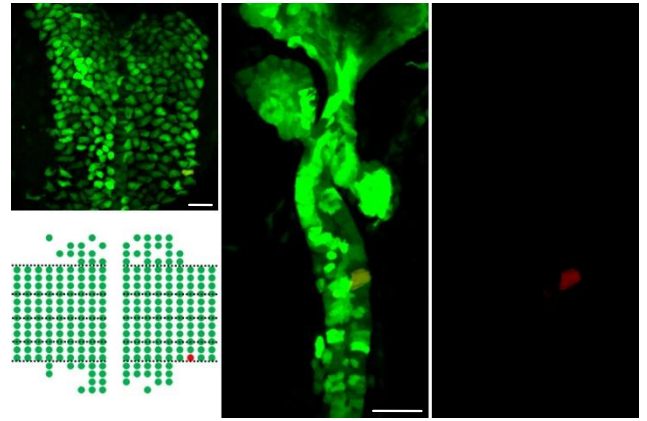

L-c8s1r1 (n=6)

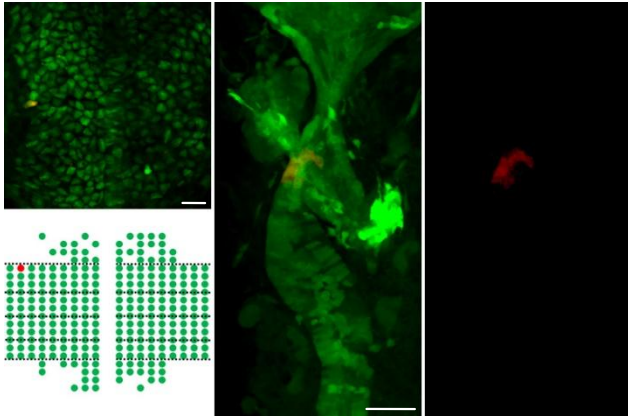

R-c8s1r1 (n=8)

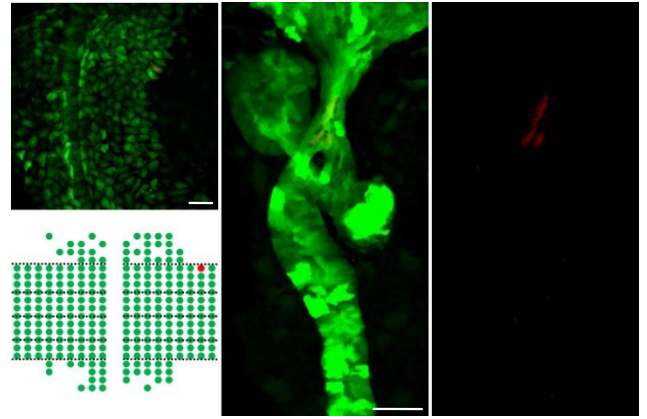

L-c8s1r2 (n=8)

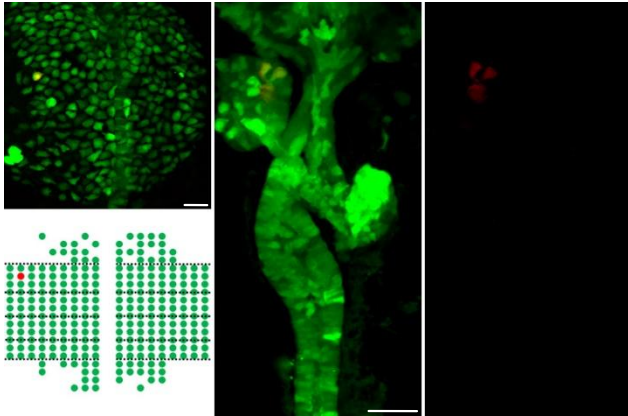

R-c8s1r2 (n=7)

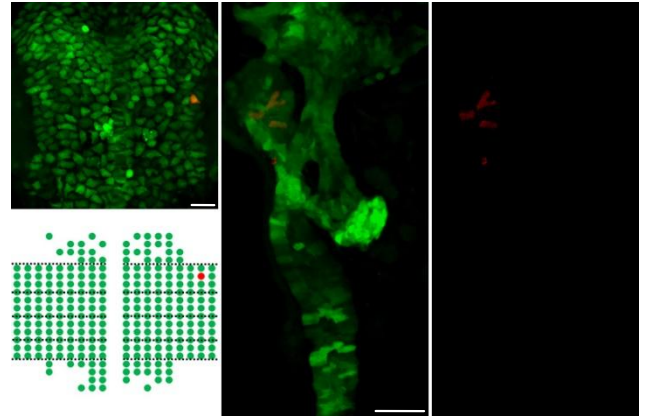

L-c8s1r3 (n=5)

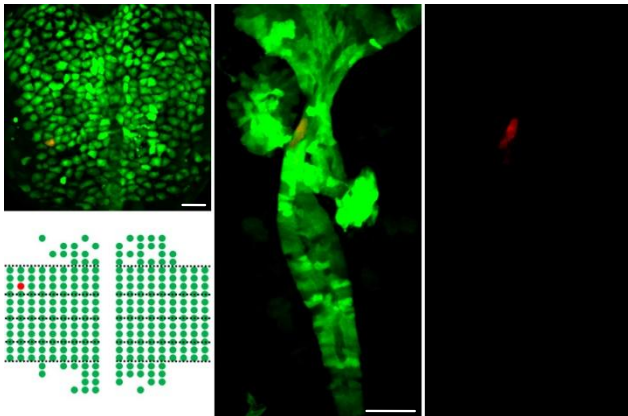

R-c8s1r3 (n=10)

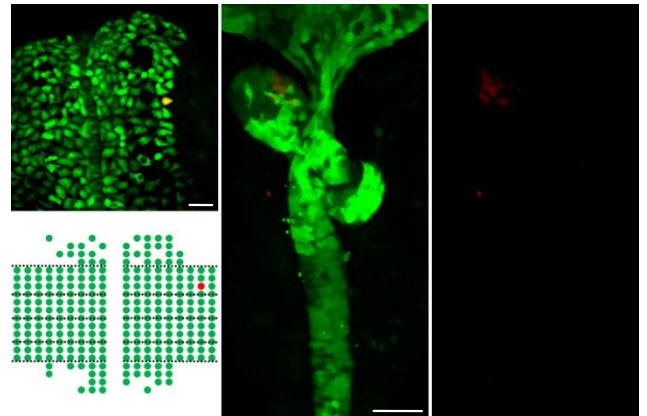

L-c8s12 (n=10)

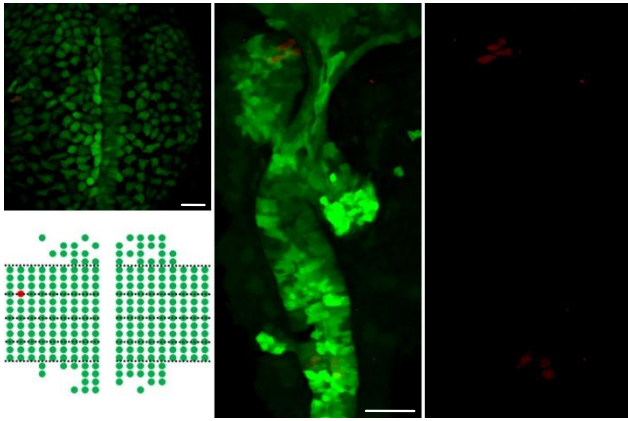

R-c8s12 (n=6)

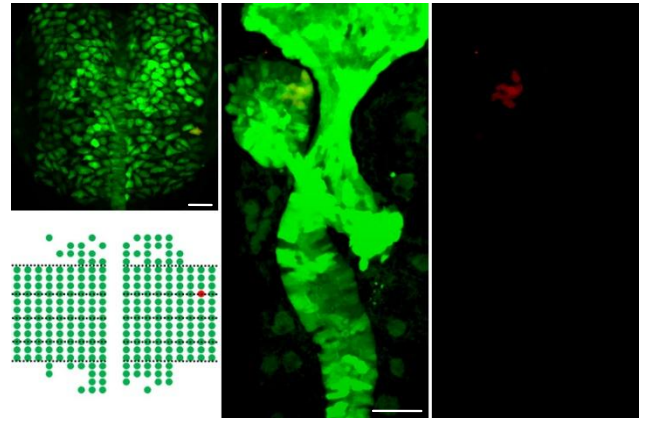

L-c8s2r1 (n=6)

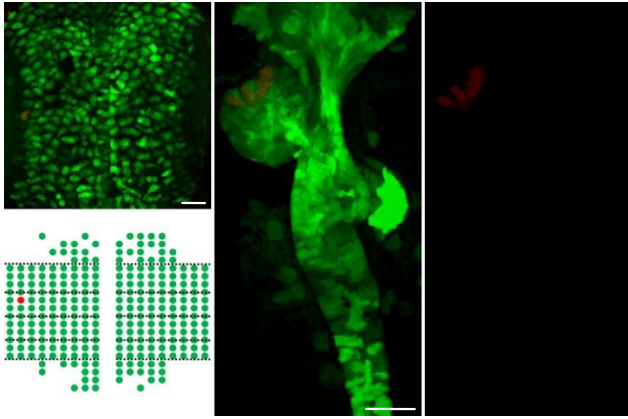

R-c8s2r1 (n=5)

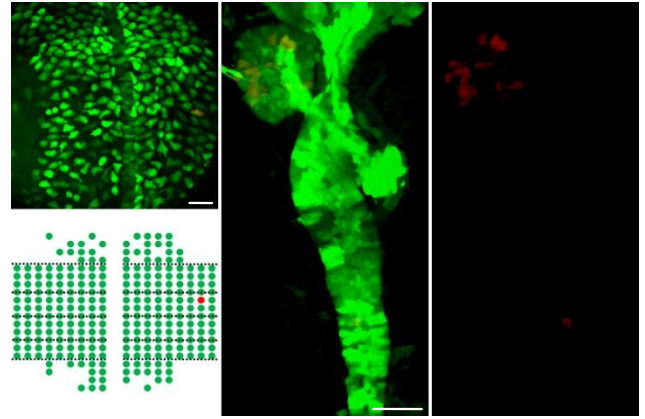

L-c8s2r2 (n=8)

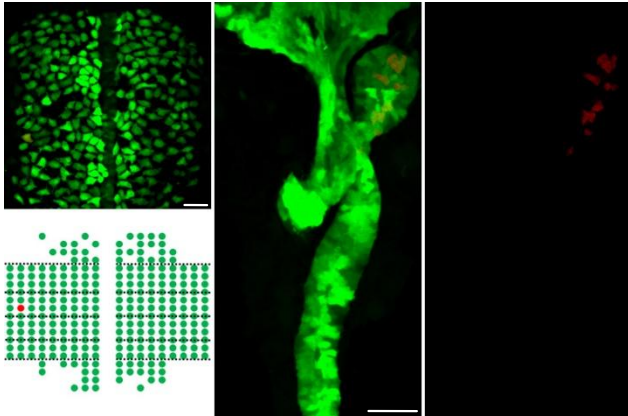

R-c8s2r2 (n=5)

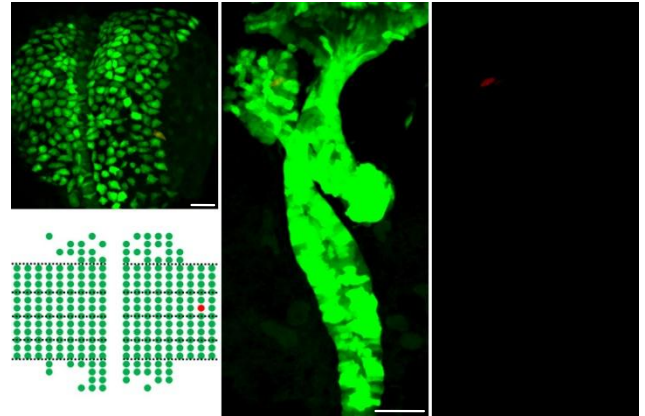

L-c8s23 (n=10)

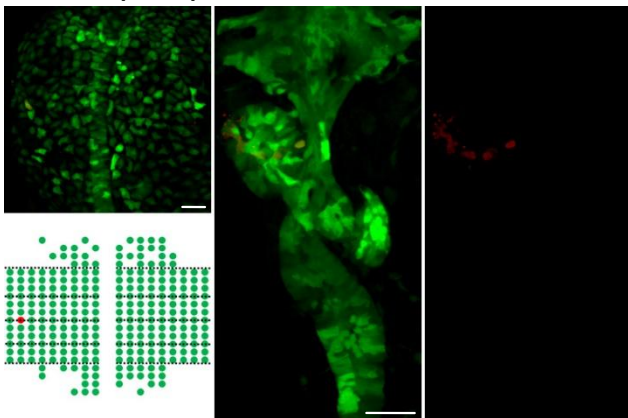

R-c8s23 (n=8)

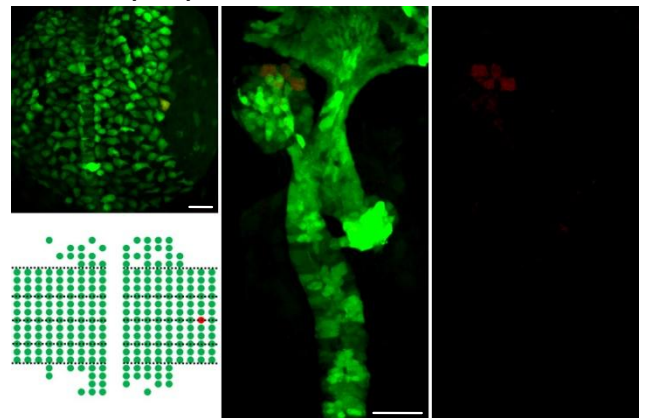

L-c8s3r1 (n=5)

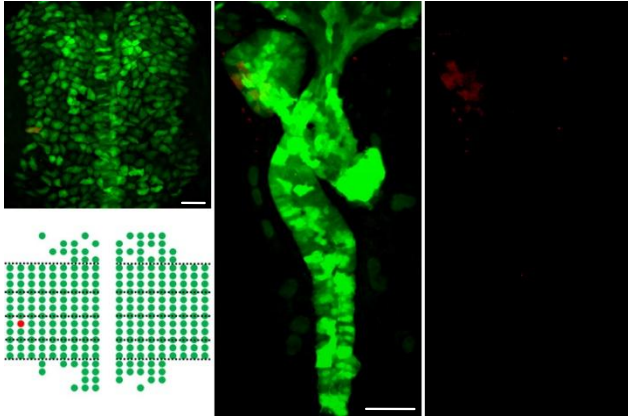

R-c8s3r1 (n=8)

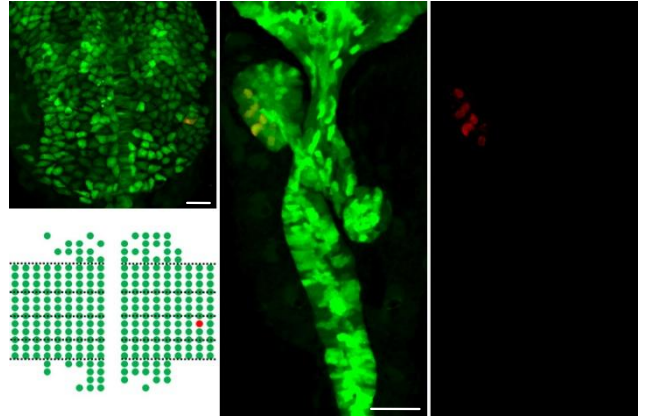

L-c8s3r2 (n=6)

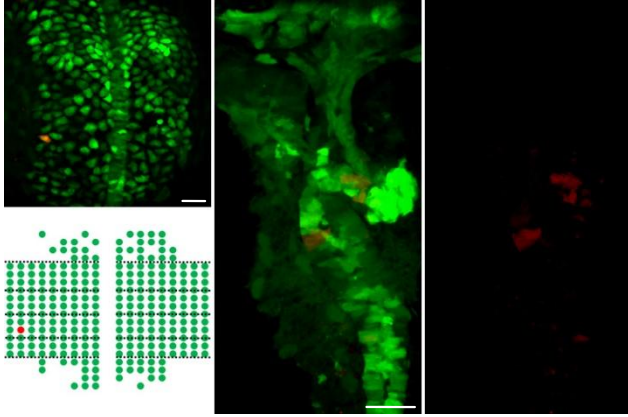

R-c8s3r2 (n=10)

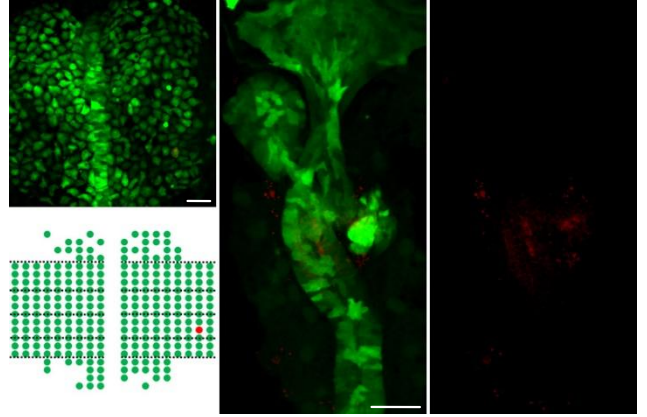

L-c8s34 (n=8)

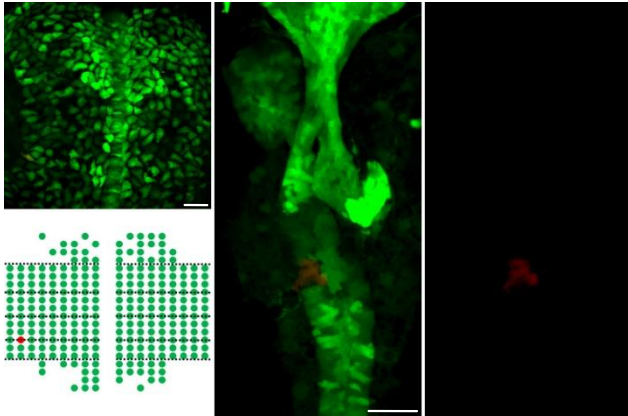

R-c8s34 (n=8)

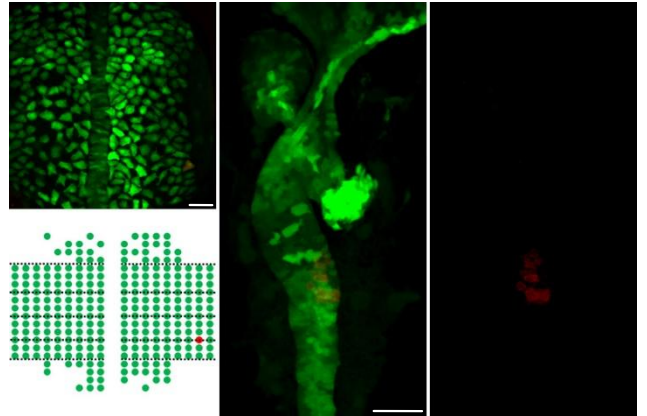

L-c8s4r1 (n=6)

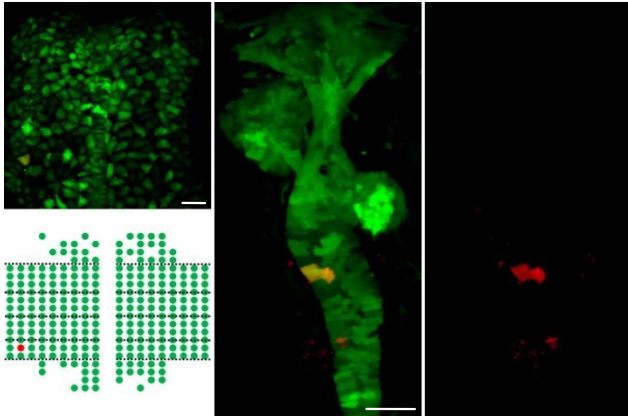

R-c8s4r1 (n=5)

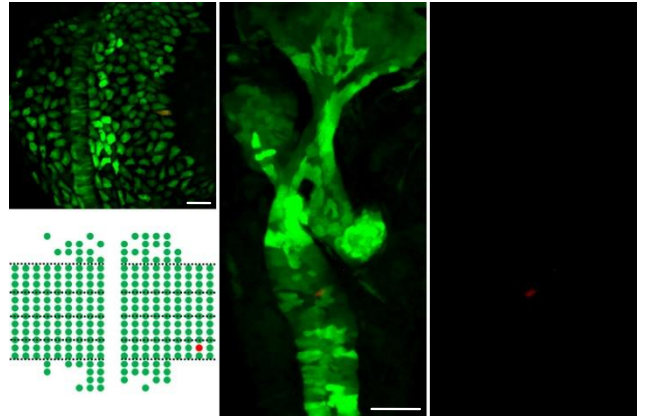



L-c8s4r2 (n=8)

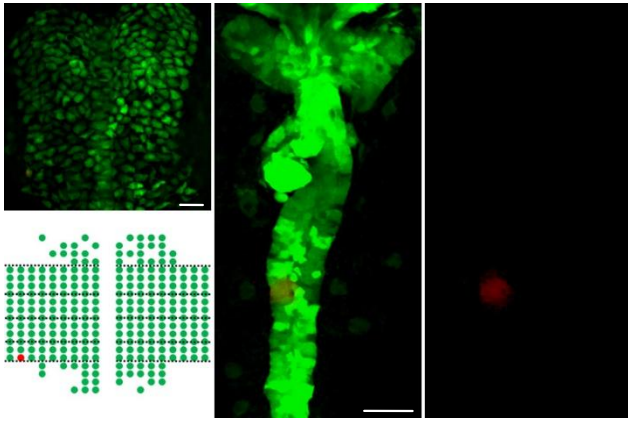

R-c8s4r2 (n=7)

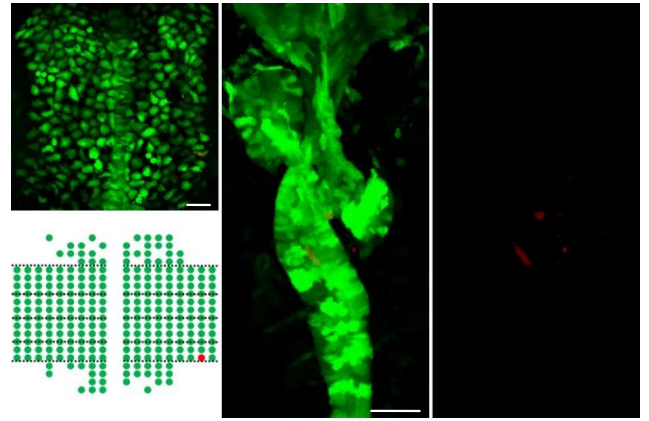

L-c9s1r1 (n=5)

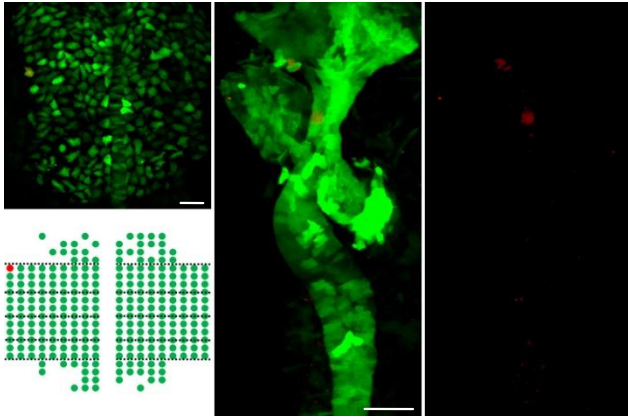

R-c9s1r1 (n=5)

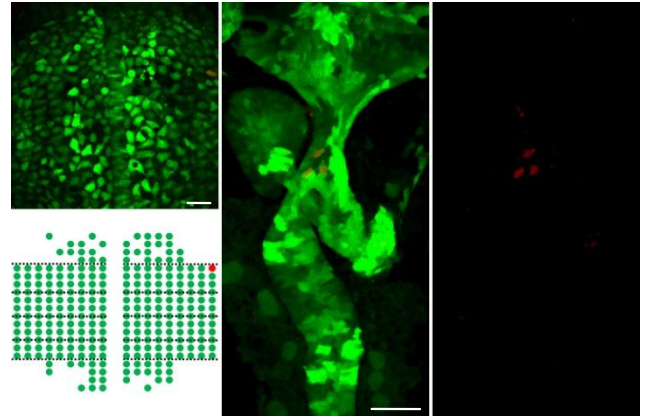

L-c9s1r2 (n=6)

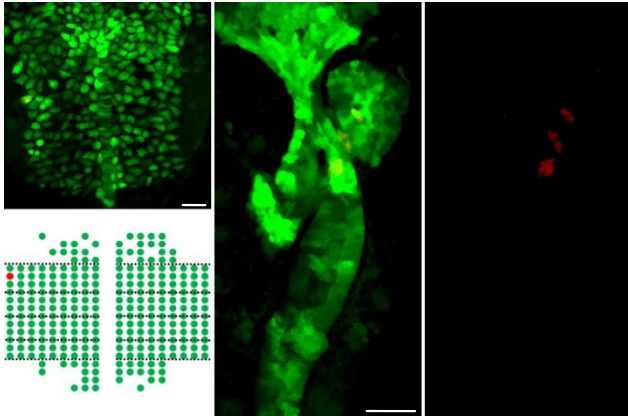

R-c9s1r2 (n=10)

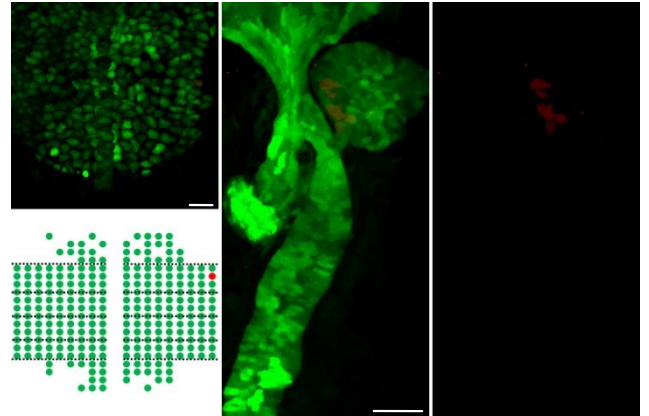

L-c9s1r3 (n=6)

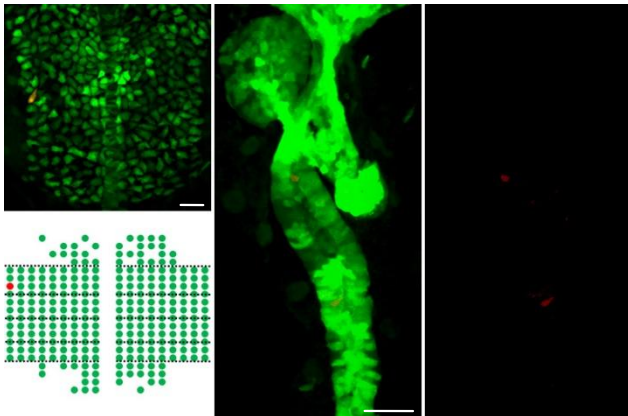

R-c9s1r3 (n=7)

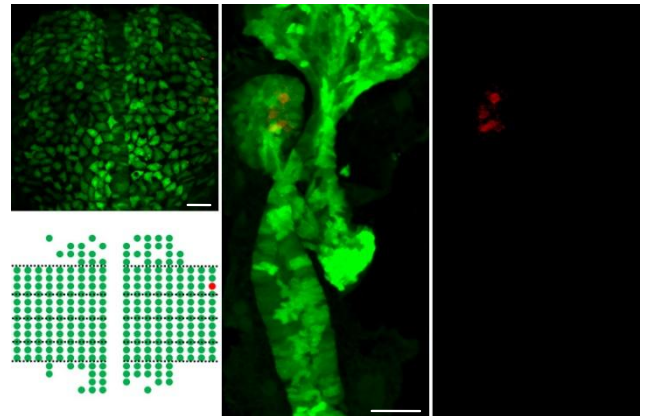

L-c9s12 (n=6)

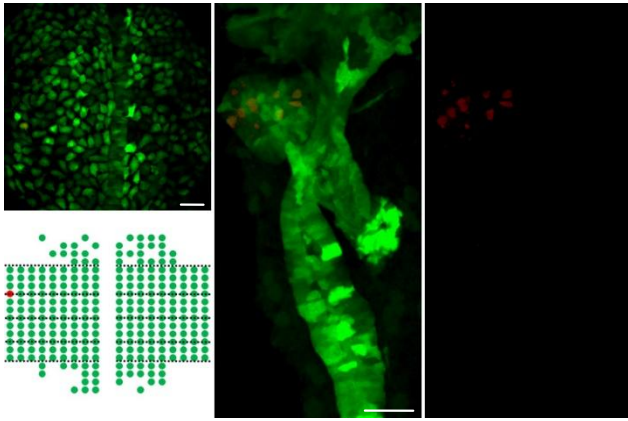

R-c9s12 (n=8)

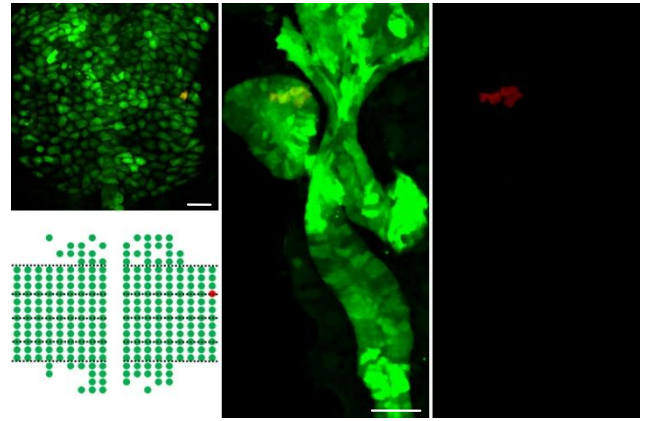

L-c9s2r1 (n=5)

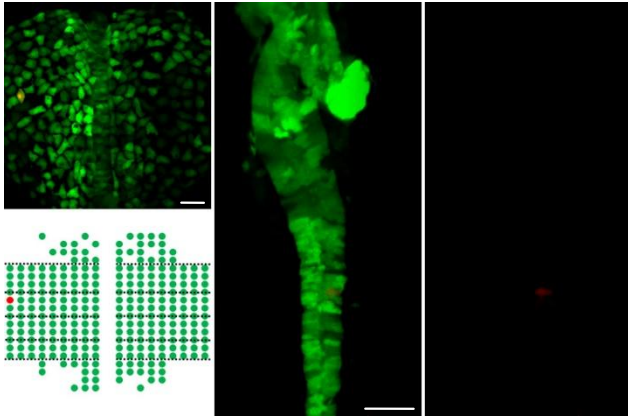

R-c9s2r1 (n=5)

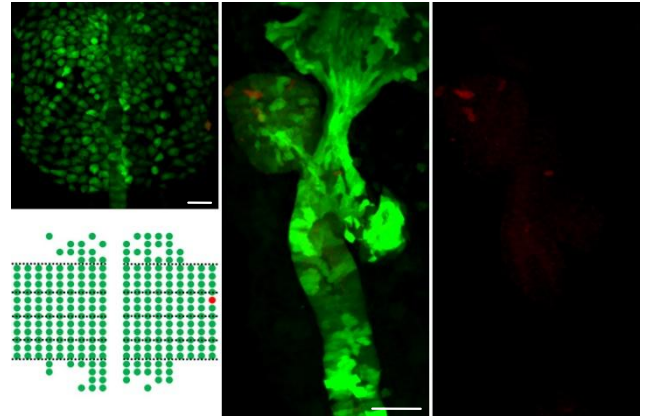

L-c9s2r2 (n=6)

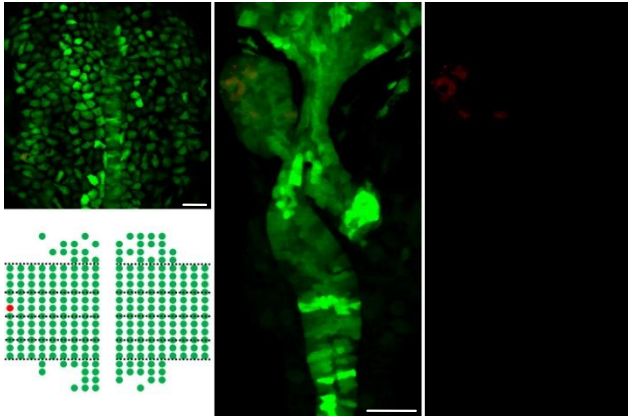

R-c9s2r2 (n=7)

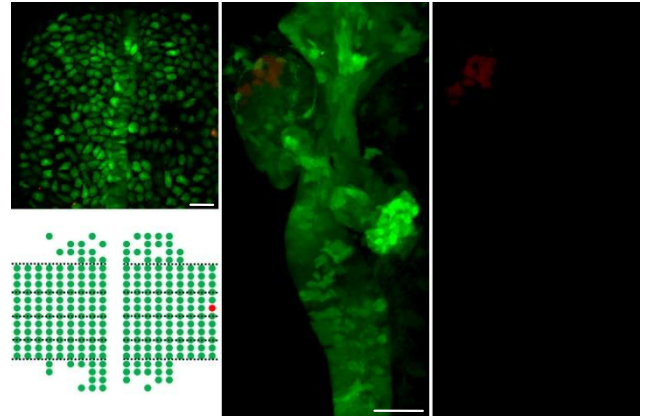

L-c9s23 (n=8)

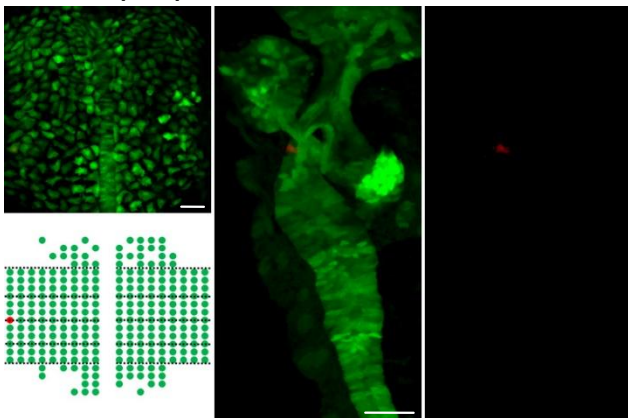

R-c9s23 (n=8)

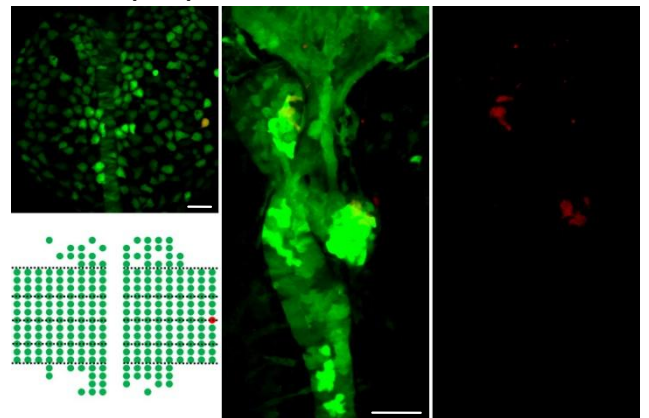

L-c9s3r1 (n=5)

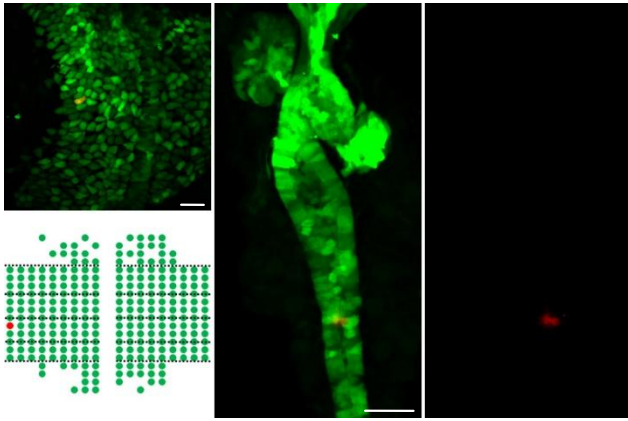

R-c9s3r1 (n=6)

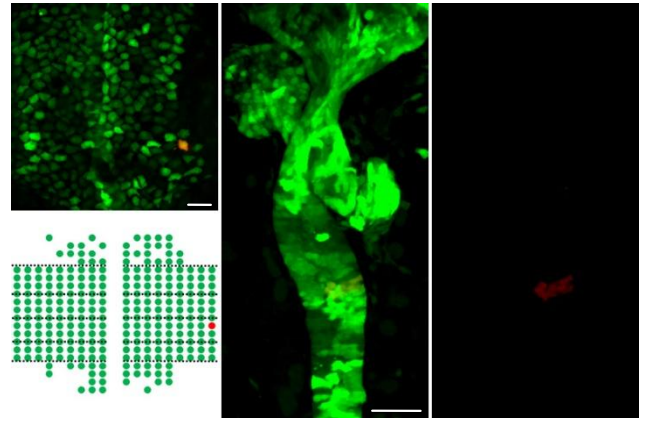

L-c9s3r2 (n=8)

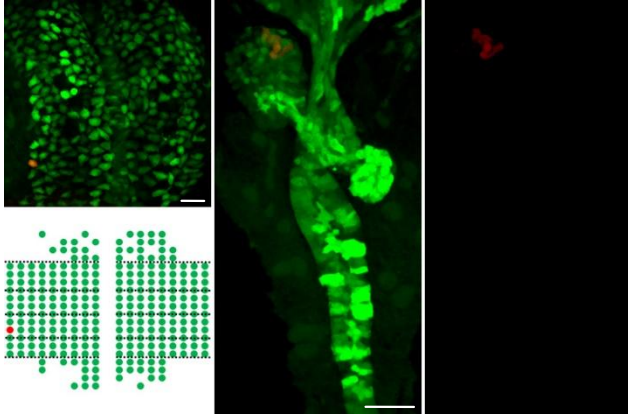

R-c9s3r2 (n=8)

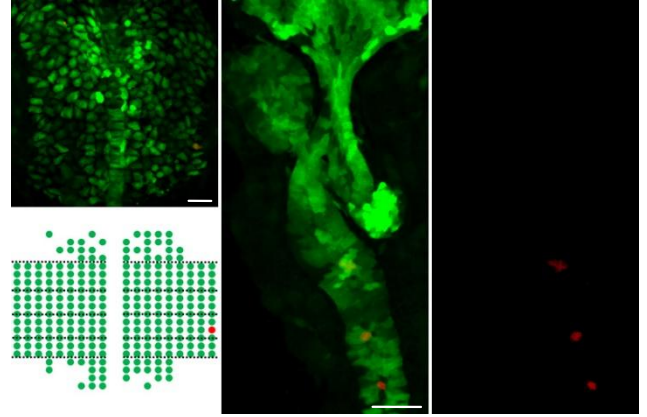

L-c9s34 (n=6)

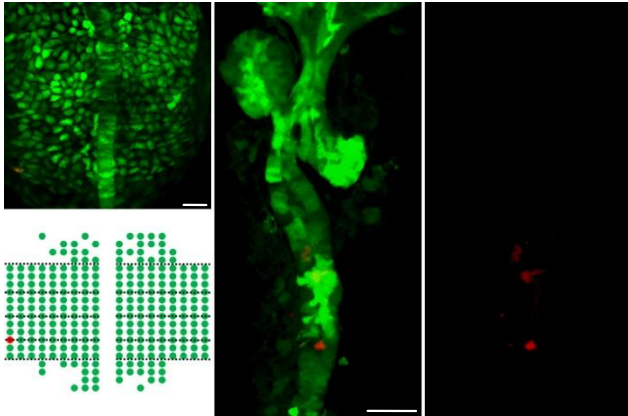

R-c9s34 (n=8)

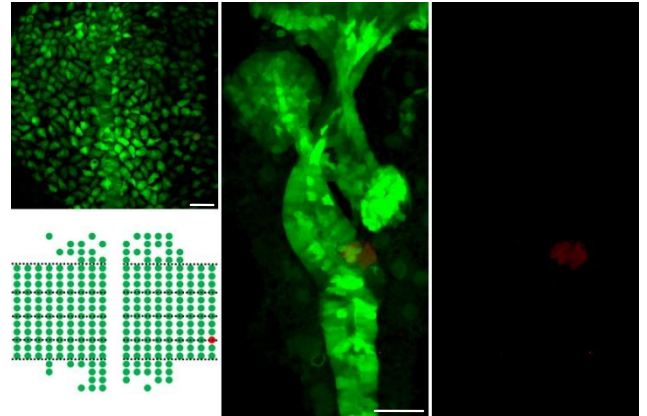

L-c9s4r1 (n=8)

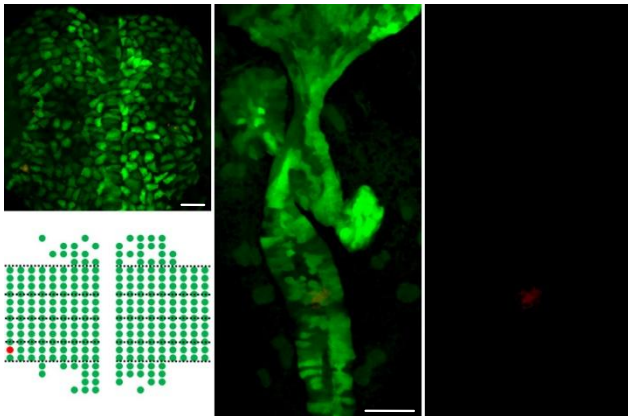

R-c9s4r1 (n=5)

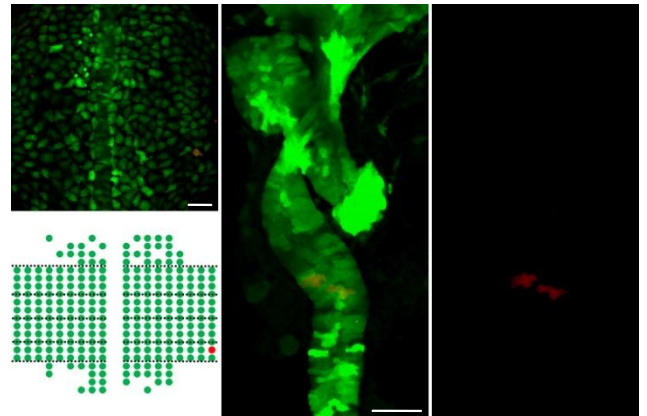

L-c9s4r2 (n=6)

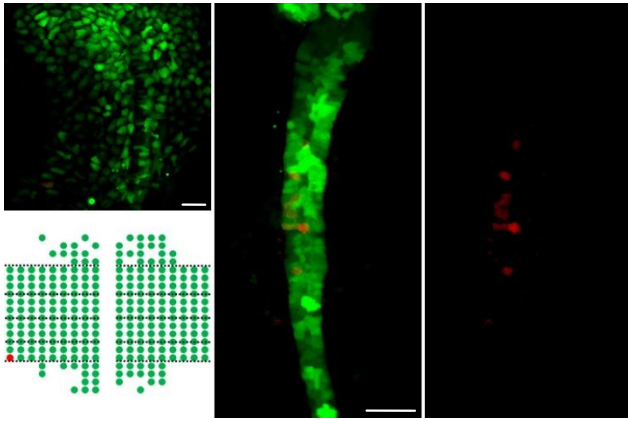

R-c9s4r1 (n=5)

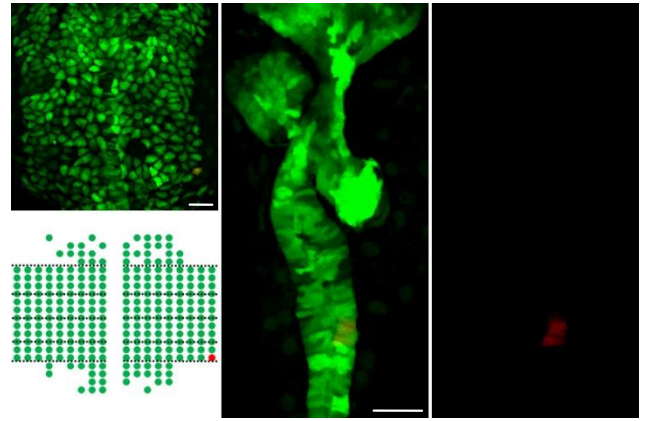

Supplement: pnas.2025793118.sd01.pdf [file pnas.2025793118.sd01.pdf]
