# Supplementary material
Source: PubMed Central journal article supplement (PMC8237672)

**Dataset S2. Single-cell labeling and descendants tracing for the 57 positions of early endoderm outside the levels between somite-1 and somite-4.**

**L-A-c1r4 (n=5)**

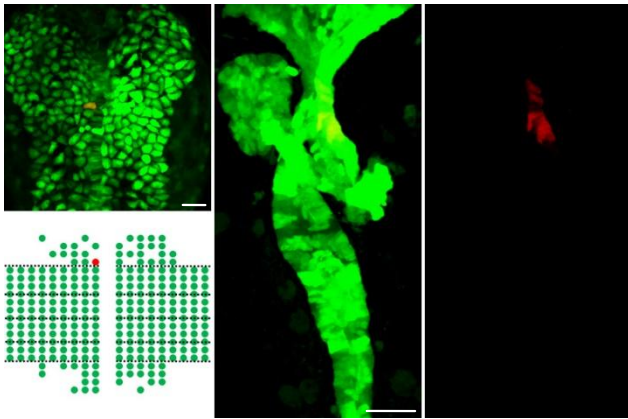

**R-A-c1r2 (n=5)**

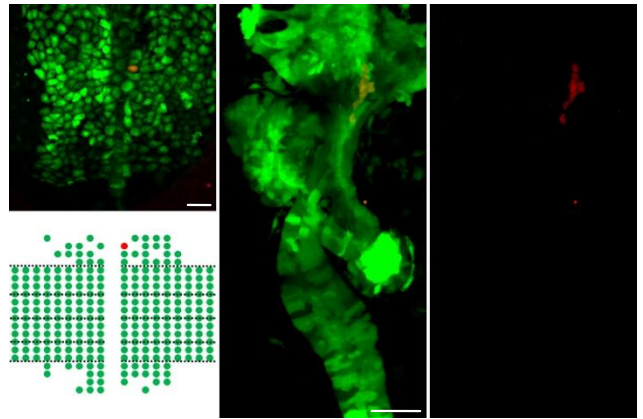

**L-A-c2r4 (n=5)**

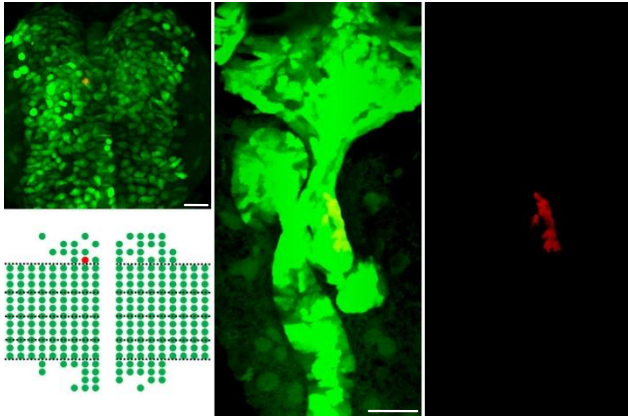

**R-A-c1r4 (n=5)**

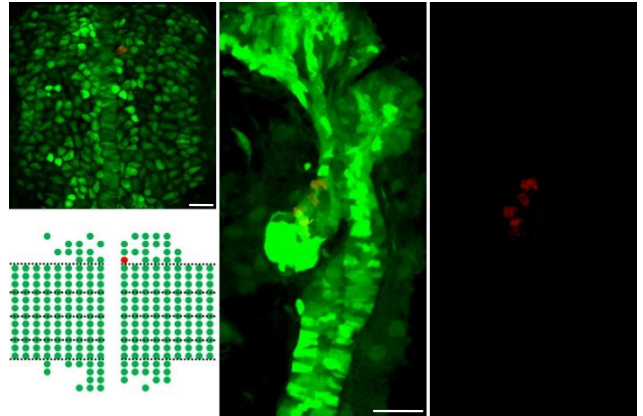

**L-A-c3r2 (n=5)**

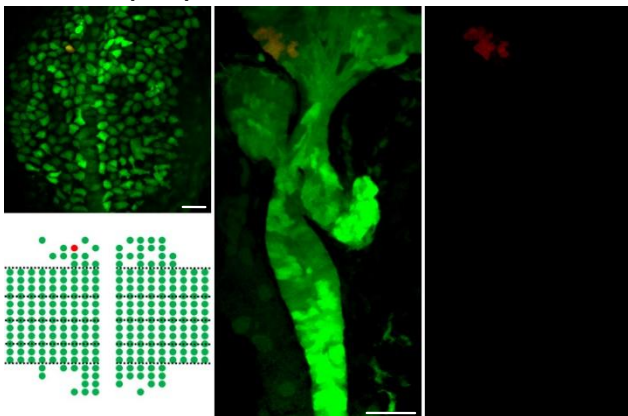

**R-A-c3r3 (n=5)**

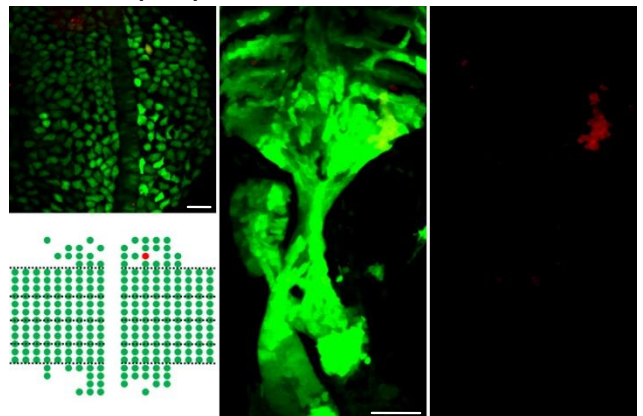

L-A-c4r2 (n=5)

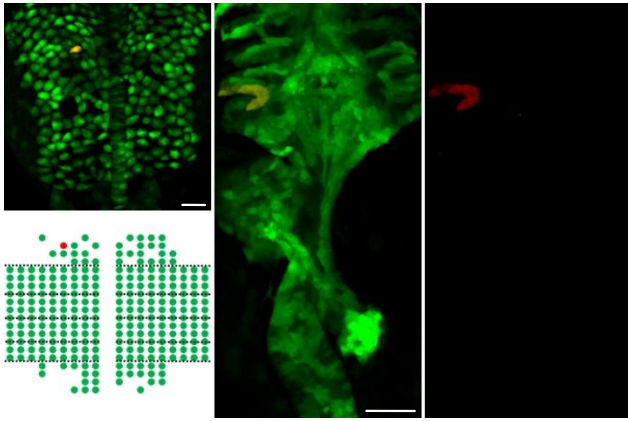

R-A-c3r4 (n=5)

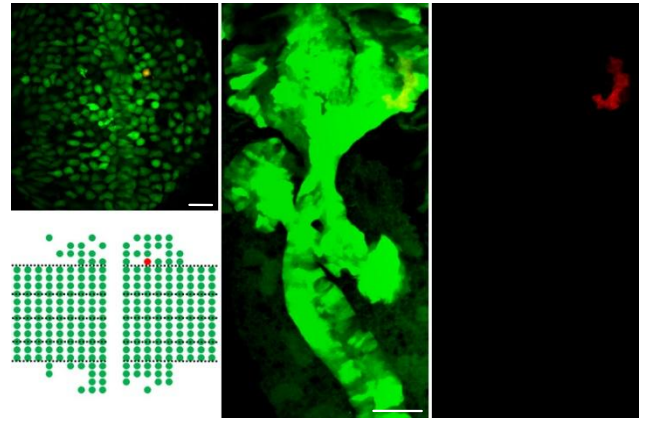

L-A-c4r3 (n=5)

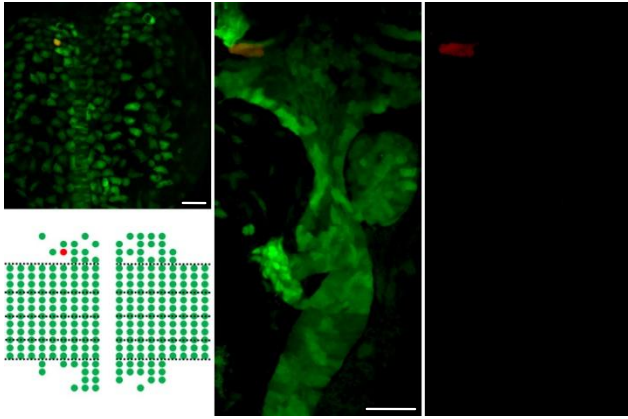

R-A-c4r2 (n=5)

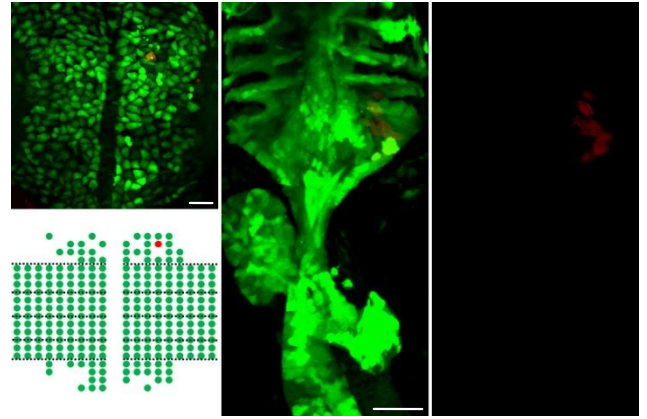

L-A-c6r1 (n=5)

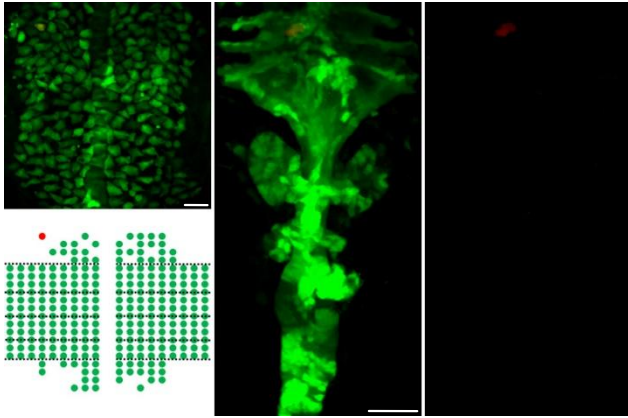

R-A-c5r1 (n=5)

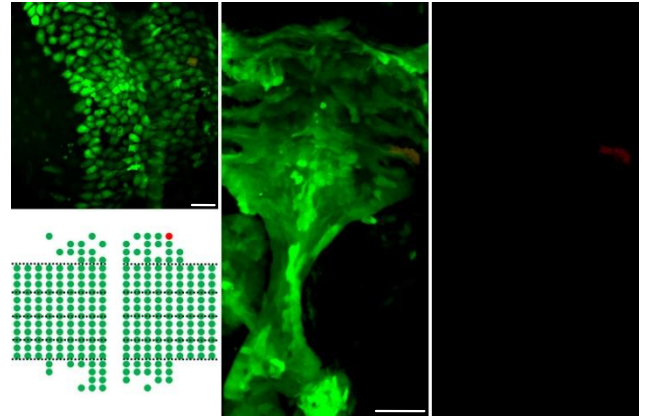

L-P-c1r1 (n=7)

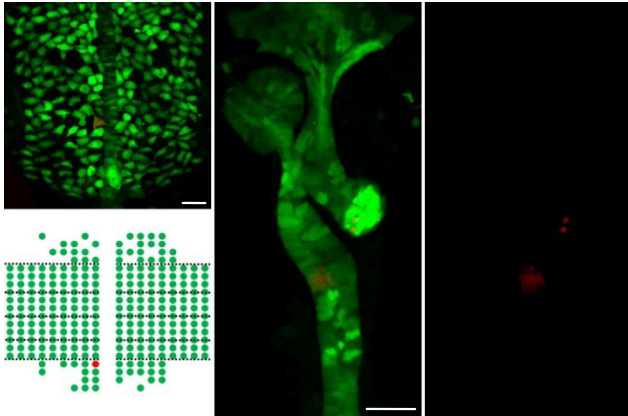

R-A-c5r4 (n=5)

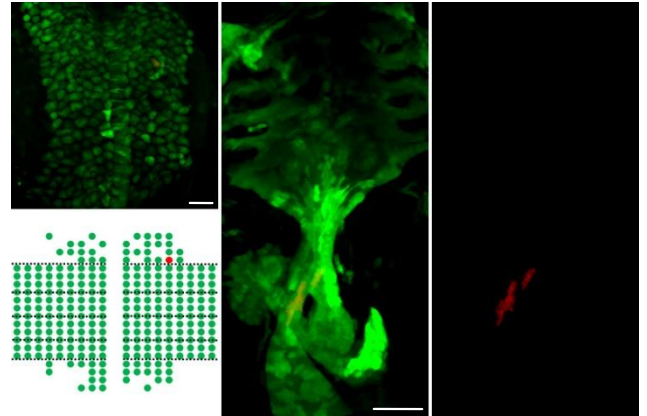

L-P-c1r2 (n=5)

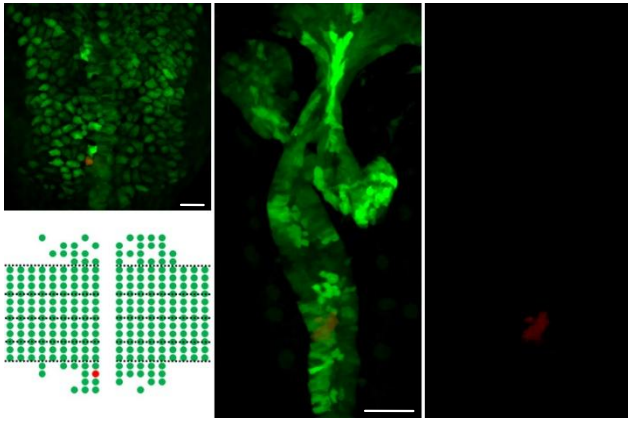

R-P-c1r1 (n=5)

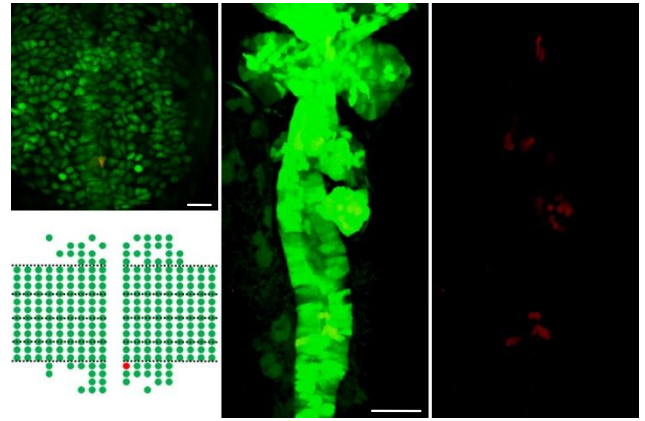

L-P-c1r3 (n=5)

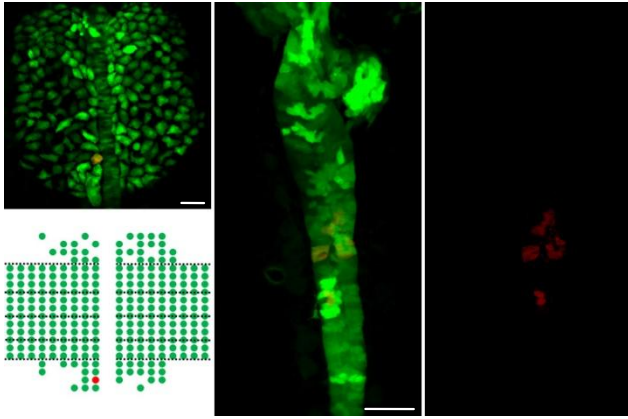

R-P-c1r3 (n=5)

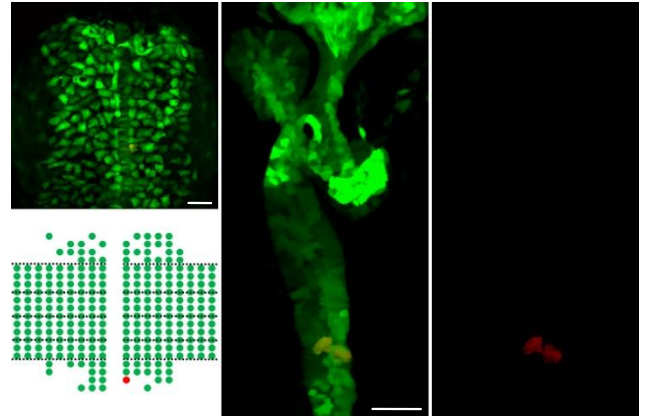

L-P-c1r4 (n=5)

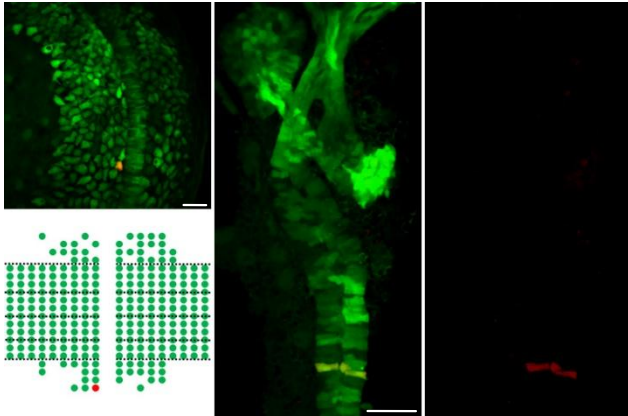

R-P-c2r1 (n=5)

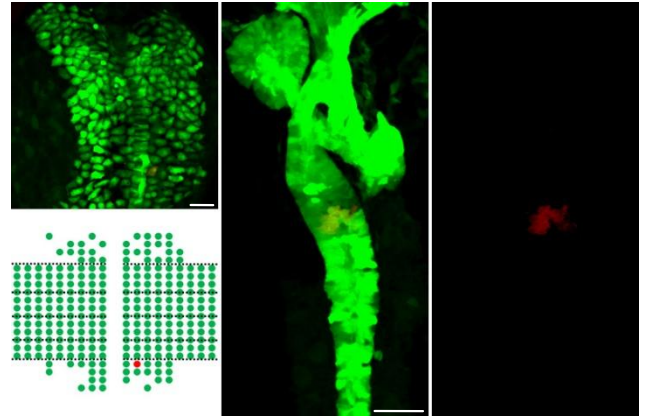

L-P-c2r2 (n=5)

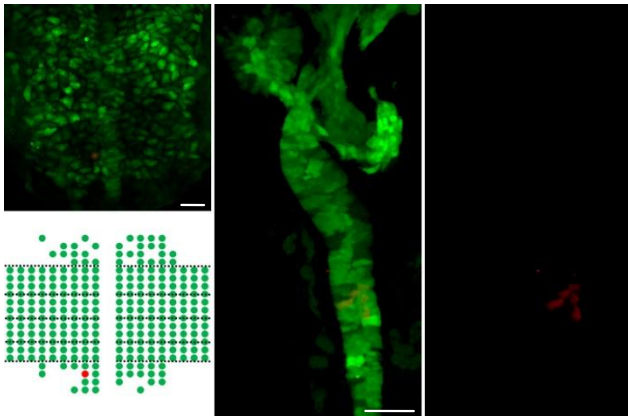

R-P-c2r2 (n=5)

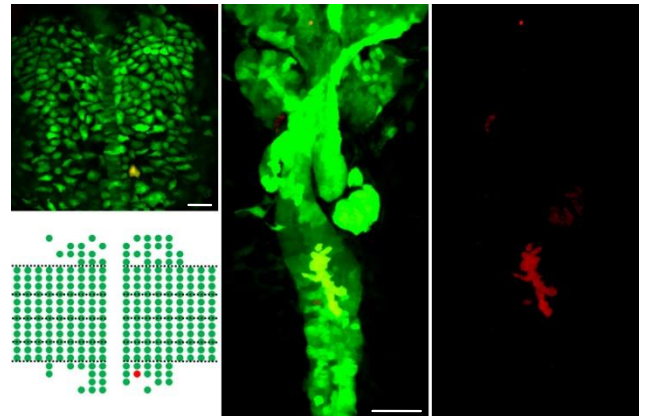



R-P-c5r3 (n=5)

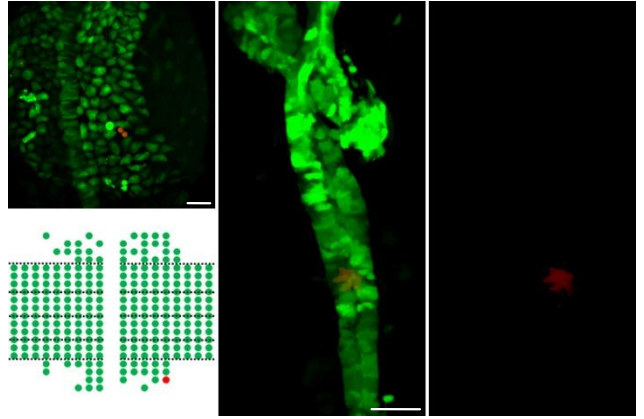

Supplement: pnas.2025793118.sd02.pdf [file pnas.2025793118.sd02.pdf]
